# **Title: Expansion of Functional Regulatory T Cells Using Soluble RAGE Prevents Type 1 Diabetes**

**Authors:** Sherman S. Leung<sup>1,2</sup>, Danielle J. Borg<sup>1,3</sup>, Domenica A. McCarthy<sup>1</sup>, Tamar E. Boursalian<sup>4</sup>, Justen Cracraft<sup>4</sup>, Aowen Zhuang<sup>1</sup>, Amelia K. Fotheringham<sup>1,2</sup>, Nicole Flemming<sup>1,2</sup>, Thomas Watkins<sup>5</sup>, John J. Miles<sup>5</sup>, Per-Henrik Groop<sup>6-9</sup>, Jean L. Scheijen<sup>10,11</sup>, Casper G. Schalkwijk<sup>10,11</sup>, Raymond J. Steptoe<sup>12</sup>, Kristen J. Radford<sup>2,13</sup>, Mikael Knip<sup>6,7,14</sup>, Josephine M. Forbes<sup>1,9,15\*</sup>

## **Affiliations:**

<sup>1</sup>Glycation and Diabetes, Mater Research Institute - The University of Queensland (MRI-UQ), Translational Research Institute (TRI), Brisbane, QLD 4102, Australia.

<sup>2</sup>School of Biomedical Sciences, The University of Queensland, Brisbane, QLD 4067, Australia.

<sup>3</sup>Inflammatory Disease Biology and Therapeutics, MRI-UQ, TRI, Brisbane, QLD 4102, Australia.

<sup>4</sup>Type 1 Diabetes Research Center, Novo Nordisk, Seattle, WA 98109, US.

<sup>5</sup>Centre for Biodiscovery and Molecular Development of Therapeutics, Australian Institute of Tropical Health and Medicine (AITHM), James Cook University, Cairns, QLD 4870, Australia.

<sup>6</sup>Research Programs Unit, Diabetes and Obesity, University of Helsinki, 00100 Helsinki, Finland.

<sup>7</sup>Folkhälsan Research Center, 00290 Helsinki, Finland.

<sup>8</sup>Abdominal Center Nephrology, University of Helsinki and Helsinki University Hospital, 00100 Helsinki, Finland.

<sup>9</sup>Baker IDI Heart and Diabetes Institute, Melbourne, VIC 3004, Australia.

<sup>10</sup>Department of Internal Medicine, Laboratory for Metabolism and Vascular Medicine, Maastricht University, 6211 LK Maastricht, The Netherlands.

<sup>11</sup>Cardiovascular Research Institute Maastricht, 6229 ER Maastricht, The Netherlands.

<sup>12</sup>The University of Queensland Diamantina Institute, TRI, Brisbane, QLD 4102, Australia.

<sup>13</sup>Cancer Immunotherapies, MRI-UQ, TRI, Brisbane, QLD 4102, Australia.

<sup>14</sup>Children's Hospital, University of Helsinki and Helsinki University Hospital, 00100 Helsinki, Finland.

<sup>15</sup>Mater Clinical School, The University of Queensland, Brisbane, QLD 4101, Australia.

\*Corresponding Author: [josephine.forbes@mater.uq.edu.au](mailto:josephine.forbes@mater.uq.edu.au)

**Word Count**†: 5560

**Figures:** 6

**Tables:** 1

†Excluding Materials and Methods, References and Figure Legends

34 **Abstract**

35 Type 1 diabetes (T1D) is an autoimmune disease with no cure. Therapeutic translation has been  
36 hampered by preclinical reproducibility. Here, short-term administration of an antagonist to the  
37 receptor for advanced glycation end products (sRAGE) protected against murine diabetes at two  
38 independent centers. Treatment with sRAGE increased regulatory T cells ( $T_{\text{regs}}$ ) within islets,  
39 pancreatic lymph nodes and spleen, increasing islet insulin expression and function. Diabetes  
40 protection was abrogated by  $T_{\text{reg}}$  depletion and shown to be dependent on antagonizing RAGE  
41 using knockout mice. Human  $T_{\text{regs}}$  treated with a RAGE ligand downregulated genes for  
42 suppression, migration and  $T_{\text{reg}}$  homeostasis (*FOXP3*, *IL7R*, *TIGIT*, *JAK1*, *STAT3*, *STAT5b*,  
43 *CCR4*). Loss of suppressive function was reversed by sRAGE, where  $T_{\text{regs}}$  increased proliferation  
44 and suppressed conventional T cell division, confirming that sRAGE expands functional human  
45  $T_{\text{regs}}$ . These results highlight sRAGE as an attractive treatment to prevent diabetes, showing  
46 efficacy at multiple research centers and in human T cells.

## 47 **Introduction**

48 Type 1 diabetes (T1D) is an autoimmune disease involving a heterogeneous interplay between  
49 genetics and environmental factors resulting in T cell mediated destruction of insulin-producing  
50  $\beta$  cells (Atkinson et al., 2014). T1D incidence is increasing at 2-3% per year worldwide,  
51 elevating the risk for premature death and costing \$14 billion per annum in healthcare in the  
52 USA alone (Tao et al., 2010). Risk factors for developing T1D include decreases in functional  
53 regulatory T cells ( $T_{\text{regs}}$ ) (Brusko et al., 2005) and increased numbers of autoantigen-specific  
54 conventional T cells ( $T_{\text{convs}}$ ), particularly those with an effector phenotype ( $T_{\text{eff}}$ ) (Laban et al.,  
55 2018). Early phase clinical trials promoting the expansion of  $T_{\text{regs}}$ , thereby suppressing  $T_{\text{conv}}$   
56 activation, have shown promise in preserving insulin production after the diagnosis of T1D  
57 (Alhadj Ali et al., 2017; Rosenzweig et al., 2015), but await validation in larger cohorts.  
58 However, it is now recognized that interventions aimed at reversing clinically diagnosed T1D  
59 may be "too late", with Phase III clinical trials not reaching primary end points (Insel et al.,  
60 2015). As a result, promising therapeutics targeting T cells are being repurposed for use  
61 prediabetes to prevent the onset of T1D (NCT01030861; NCT01773707). Recently, the former  
62 study, which was a phase II randomized trial, reported that Teplizumab – a Fc-receptor non-  
63 binding anti-CD3 monoclonal antibody – significantly delayed the onset of T1D (Herold et al.,  
64 2019).

65 In fact, a framework for staging prediabetes was recently established which involves  
66 standardized screening to accurately stratify individuals into Prediabetes Stages 1-3 so that novel  
67 therapies can be tested within a suitable therapeutic window (Insel et al., 2015). Thus,  
68 interventions delivered prediabetes are clinically feasible, have a greater chance of preserving  
69 insulin secretion and could prevent the onset of T1D.

70 The receptor for advanced glycation end products (RAGE) is a pattern recognition receptor  
71 implicated in inflammatory disease and is expressed in various cells involved in T1D including T  
72 cells (reviewed in (Leung et al., 2016)). Recently, changes in RAGE expression have been  
73 associated with the risk for developing T1D in humans (Salonen et al., 2015; Salonen et al.,  
74 2014; Salonen et al., 2016). Furthermore, T cells from at-risk individuals who progress to T1D,  
75 have greater RAGE expression, which enhances T cell cytokine production and survival  
76 (Durning et al., 2016). Natural history studies have further revealed that polymorphisms in the  
77 RAGE gene (*AGER*) decrease circulating soluble RAGE (sRAGE) concentrations (Salonen et  
78 al., 2014), which is a naturally occurring antagonist that competes for RAGE ligands, increasing  
79 the risk of T1D (Forbes et al., 2011). The decreases in circulating sRAGE also coincide with  
80 seroconversion to autoantibodies against islet auto-antigens in at-risk individuals (Salonen et al.,  
81 2015; Salonen et al., 2016). Therefore, this deficiency in circulating sRAGE is a novel  
82 therapeutic target for preventing the onset of T1D.

83 Here, we targeted the deficiency in circulating sRAGE levels prediabetes by short-term  
84 administration of recombinant human sRAGE with the aim of preventing diabetes onset in mice.  
85 We show that it acts in an immunomodulatory manner to decrease diabetes incidence at two  
86 independent research centers through  $T_{reg}$  modulation. Additionally, sRAGE increased the  
87 proportion of  $T_{regs}$  in the islet infiltrating leukocytes, pancreatic lymph nodes (PLN) and spleen,  
88 which reduced islet infiltration and preserved islet numbers, insulin expression and  $\beta$  cell  
89 function. *Ex vivo*, sRAGE promoted the expansion of human  $T_{regs}$  and reduced  $T_{conv}$  proliferation  
90 in co-culture, whereas  $T_{regs}$  cultured in the presence of the RAGE ligand, AGEs, had reduced  
91 suppressive function. Our data suggest that short-term delivery of sRAGE prediabetes is an

92 effective modulator of functional T<sub>reg</sub> expansion and has efficacy to prevent diabetes and  
93 possibly other autoimmune diseases.

Mater Medical Research Institute Limited - Confidential

## 94 **Results**

### 95 **Short-Term sRAGE Treatment Provides Lasting Protection from Diabetes in Multi-Site**

#### 96 **Trial**

97 There is no cure for T1D so there is a desperate need for reproducible and translatable novel  
98 disease targets. Here, we administered recombinant human sRAGE prediabetes to correct the  
99 deficiency in circulating sRAGE seen in at-risk progressors who develop T1D (Salonen et al.,  
100 2015; Salonen et al., 2014; Salonen et al., 2016), using a preclinical study design tested for  
101 reproducibility at two independent research centers (Figure 1A).

102 When sRAGE was administered intraperitoneally twice daily, the incidence of diabetes  
103 decreased 3-fold when compared with vehicle treated mice (Figure 1B, Site 1). We found  
104 comparable results at an independent research center with greater diabetes penetrance (Figure  
105 1B, Site 2), where sRAGE treatment resulted in a 2.8-fold reduction in diabetes incidence (vs.  
106 untreated; Figure 1B). At a greater dose administered only once daily, sRAGE treatment was  
107 even more effective and decreased diabetes incidence by 4-fold (vs. untreated; Figure 1B).

108 Non-fasted blood glucose levels in sRAGE treated mice were significantly lower over the  
109 study duration when compared with vehicle and untreated mice using regression analysis (Figure  
110 1C). Furthermore, the regression line and its confidence intervals for the once daily sRAGE  
111 treatment regimen were lower than those of the remaining groups, until approximately day 200  
112 when both sRAGE groups had overlap (Figure 1C). Blood glucose variability was also reduced  
113 following sRAGE administration, as determined by decreased residuals from the regression line  
114 (vs. vehicle/untreated; Figure 1C). These findings demonstrate that short-term sRAGE treatment  
115 significantly reduces diabetes incidence and improves long-term blood glucose control. From

Mater Medical Research Institute Limited - Confidential

116 herein, we characterize the effects of sRAGE given twice daily because we were able to observe  
117 significant protection from diabetes at this lower dose.

### 118 **sRAGE Therapy Decreases Islet Infiltration and Increases Islet Numbers**

119 Immune cell infiltration into the pancreatic islets and islet destruction are pathological  
120 hallmarks of T1D (Atkinson et al., 2014), so we hypothesized that these facets of disease  
121 pathogenesis would be improved by sRAGE treatment. To this end, immediately after therapy  
122 completion on day 64, mice treated with sRAGE had a considerably reduced islet infiltration  
123 index as compared with vehicle (Figure 1D). This was due to a decrease in the numbers of islets  
124 presenting with high grade insulinitis (>75% infiltrate, grade 4) and an increase in islets without  
125 insulinitis (0% infiltrate, grade 0; Figure 1E and 1F). Interestingly, by day 80, the islet infiltration  
126 index did not differ between groups (Figure 1D) but unexpectedly, sRAGE treated mice had a  
127 small increase in the proportion of islets with grade 4 insulinitis (>75% infiltration; Figure 1E and  
128 1F). When sRAGE treated mice were examined on day 225, we found a significant reduction in  
129 the islet infiltration index (Figure 1D), an increased proportion of islets without immune cell  
130 infiltration and a reduced proportion of islets that scored 4 (vs. vehicle; Figure 1E and 1F). Islet  
131 numbers decreased over the study duration in both cohorts (Figure 1G), but sRAGE treatment  
132 preserved a greater number of islets by day 225 (Figure 1G). Islet numbers did not differ  
133 between groups at the other time points (Figure 1G).

### 134 **sRAGE Rapidly Increases $T_{reg}/T_{eff}$ Ratios in the PLN and Spleen**

135  $T_{regs}$  in the PLN and spleen regulate islet infiltration, influencing the development of diabetes  
136 (McNally et al., 2011). Thus, we tested whether sRAGE could influence the numbers of  $T_{regs}$  and  
137  $T_{convs}$  in these lymphoid tissues, in addition to  $T_{reg}/T_{eff}$  ratios (gating strategies in Figure S1).  
138 Immediately after sRAGE therapy on day 64, higher numbers of  $CD4^+CD8^-CD25^+Foxp3^+$   $T_{regs}$ ,

Mater Medical Research Institute Limited - Confidential

139 as well as FoxP3<sup>-</sup>CD4<sup>+</sup> and FoxP3<sup>-</sup>CD8<sup>+</sup> T<sub>conv</sub>s were observed in the PLN and spleen (vs.  
140 vehicle; Figure S2A-S2C). This is consistent with previous reports showing that sRAGE  
141 treatment is immunomodulatory, since it can increase the numbers of monocytes, macrophages  
142 and B cells (Pullerits et al., 2006). However, there are no studies showing that sRAGE can  
143 expand the numbers of T cells, nor its specific effects on the T cell subsets of T<sub>regs</sub>, T<sub>conv</sub>s and  
144 T<sub>eff</sub>s.

145 Here, we found a superior increase in PLN T<sub>reg</sub> numbers, resulting in elevated T<sub>reg</sub>/T<sub>eff</sub> cell  
146 ratios in sRAGE treated mice (Figure 2A-2C), which suggested the local environment was more  
147 regulated. Despite the increase in splenic T<sub>regs</sub>, its ratio to T<sub>eff</sub> cells remained unchanged on day  
148 64 (Figure 2A-2C). There was no change in the activation status of FoxP3<sup>-</sup>CD4<sup>+</sup> and FoxP3<sup>-</sup>  
149 CD8<sup>+</sup> T<sub>conv</sub>s following sRAGE treatment in either lymphoid compartments, as determined by the  
150 expression of the CD62L and CD44 adhesion molecules (Figure S2B and S2C).

151 By day 225, sRAGE treated mice had decreased numbers of CD4<sup>+</sup>CD8<sup>-</sup>CD25<sup>+</sup>Foxp3<sup>+</sup> T<sub>regs</sub>  
152 and FoxP3<sup>-</sup>CD8<sup>+</sup> T<sub>conv</sub>s in the PLN, as well as reduced numbers of FoxP3<sup>-</sup>CD4<sup>+</sup> and FoxP3<sup>-</sup>CD8<sup>+</sup>  
153 T<sub>conv</sub>s in the spleen, as compared with vehicle (Figure S3A-S3C). This suggested that short-term  
154 sRAGE intervention persistently dampened the immune response over the study duration. In  
155 support of this, sRAGE provided a long-lasting increase in the T<sub>reg</sub>/T<sub>eff</sub> cell ratios in the spleen  
156 (vs. vehicle; Figure 2D-2F). Furthermore, the localized increase in T<sub>reg</sub>/T<sub>eff</sub> cell ratios seen in the  
157 PLN of sRAGE treated mice on day 64, was resolved by day 225 (Figure 2D-2F). The  
158 proportions of CD62L<sup>+</sup>CD44<sup>-</sup> naïve, CD62L<sup>-</sup>CD44<sup>+</sup> effector and CD62L<sup>+</sup>CD44<sup>+</sup> memory subsets  
159 in the T<sub>conv</sub> populations remained unchanged between groups on day 225 (Figure S3B and S3C).

160 To determine if changes in antigen presenting cells (APCs) could influence tolerance, we also  
161 quantified the numbers of CD8<sup>+</sup> and CD11b<sup>+</sup> conventional dendritic cells (cDCs), plasmacytoid



Mater Medical Research Institute Limited - Confidential

162 dendritic cells (pDCs) and macrophages on day 64. This is important because CD8<sup>+</sup> cDC  
163 interactions with autoreactive CD4<sup>+</sup> T cells contribute towards tolerance in NOD mice (Price et  
164 al., 2014) and, within the lymph nodes, CD8<sup>+</sup> cDCs can directly induce T<sub>regs</sub> via TGF-β  
165 (Yamazaki et al., 2008). CD11b<sup>+</sup> cDCs and pDCs are also potent inducers of T<sub>regs</sub> (Lippens et al.,  
166 2016; Tordesillas et al., 2018). Here, we found an increase in all dendritic cell subsets within the  
167 spleen but no significant changes within the PLN (Figure S4A). This supports the hypothesis that  
168 after sRAGE treatment, dendritic cells do not significantly contribute to increased proliferation  
169 or differentiation of T<sub>regs</sub> within a major lymphoid tissue in T1D. Interestingly, we found  
170 increased numbers of macrophages in both the PLN and spleen (Figure S4B), consistent with  
171 previous studies using sRAGE (Pullerits et al., 2006).

172 Overall, these data show that sRAGE preferentially increases the numbers of T<sub>regs</sub> rather than  
173 T<sub>eff</sub> cells in the PLN in the short-term. In the long-term, sRAGE reduces both T<sub>reg</sub> and T<sub>eff</sub> cell  
174 numbers in the PLN and spleen, maintaining higher splenic T<sub>reg</sub>/T<sub>eff</sub> ratios in mice at risk of  
175 diabetes.

### 176 **Diabetes Prevention by sRAGE is Dependent on T<sub>regs</sub> and RAGE Expression**

177 To further delineate the effects of sRAGE on T<sub>regs</sub>, an accelerated model of autoimmune  
178 diabetes was used that tests the immunological aspects of disease while excluding other elements  
179 such as islet dysfunction. Here, we performed the adoptive transfer of diabetes by injecting  
180 splenocytes from recently diabetic NOD/ShiLt mice into NOD/SCID recipients, that were then  
181 administered (i) vehicle and isotype control IgG, (ii) vehicle and anti-folate receptor 4 (FR4)  
182 antibodies to deplete T<sub>regs</sub>, (iii) sRAGE and isotype control IgG, or (iv) sRAGE and anti-FR4  
183 antibodies to deplete T<sub>regs</sub> (Figure 2G). We found that 72% and 78% of NOD/SCID recipient  
184 mice developed diabetes when given either vehicle and isotype IgG or vehicle and anti-FR4

Mater Medical Research Institute Limited - Confidential

185 antibodies, respectively (Figure 2H). None of the NOD/SCID mice treated with sRAGE and  
186 isotype control IgG developed diabetes, whereas 56% of those that received sRAGE and anti-  
187 FR4 antibodies to deplete  $T_{\text{regs}}$  developed diabetes (Figure 2H). We also found marked  
188 reductions in  $CD4^+CD8^-CD25^+FoxP3^+$   $T_{\text{reg}}$  proportions for mice treated with anti-FR4 antibodies  
189 whereas sRAGE and isotype control IgG treated mice had an increased proportion of  $T_{\text{regs}}$   
190 (Figure 2I). These data provide direct support that  $T_{\text{regs}}$  are required for sRAGE to protect against  
191 diabetes.

192 sRAGE competes for RAGE ligands that are also recognized by other receptors including  
193 TLRs (Das et al., 2016). Thus, we investigated if the capacity for sRAGE to preferentially  
194 increase  $T_{\text{regs}}$  was dependent on RAGE expression. First, we established that cell surface RAGE  
195 was present on  $CD4^+CD8^-CD25^+Foxp3^+$   $T_{\text{regs}}$  in the PLN and spleen in NOD/ShiLt mice on day  
196 50 of life (Figure 3A and 3B), which is when we commenced sRAGE treatment in our multi-site  
197 preclinical trial. Then, in the widely used C57BL/6 strain, we administered sRAGE to wild-type  
198 or RAGE knockout (RAGE KO) mice on days 50 to 64 of life (Figure 3C).

199 Consistent with our findings in NOD/ShiLt mice, there was a significant increase in the  
200  $T_{\text{reg}}/T_{\text{eff}}$  cell ratios in both the PLN and spleen of wild-type C57BL/6 mice administered sRAGE  
201 (Figure 3D). However, sRAGE treatment in RAGE KO mice did not alter  $T_{\text{reg}}/T_{\text{eff}}$  cell ratios in  
202 these lymphoid tissues (Figure 3E).

203 We interrogated expression of the proliferation marker Ki67, as well as  $T_{\text{reg}}$  activation  
204 markers TIGIT, KLRG1, CD44 and CD62L (representative histograms and dot plots shown in  
205 Figure 3F) in the PLN and spleen of both wild-type and RAGE KO mice administered sRAGE.  
206 Consistent with the elevated  $T_{\text{reg}}/T_{\text{eff}}$  cell ratios, the proportion of  $CD4^+CD8^-CD25^+Foxp3^+$   $T_{\text{regs}}$   
207 expressing Ki67 in wild-type mice had increased after sRAGE treatment, whereas  $CD4^+CD8^-$

Mater Medical Research Institute Limited - Confidential

208 Foxp3<sup>-</sup> T<sub>conv</sub> expression of Ki67 had declined (Figure 3G). This suggested that T<sub>reg</sub> proliferation  
209 was a significant contributor to elevating the T<sub>reg</sub>/T<sub>eff</sub> cell ratios, rather than other possible  
210 scenarios such as improved T<sub>reg</sub> emigration into the lymphoid tissues. T<sub>reg</sub> TIGIT and KLRG1  
211 expression were also elevated following sRAGE administration in wild-type mice (Figure 3G),  
212 indicating the presence of activated and highly proliferative T<sub>regs</sub> (Fuhrman et al., 2015). sRAGE  
213 treated T<sub>regs</sub> in wild-type mice also presented a more activated phenotype based on their  
214 expression of the CD62L and CD44 adhesion molecules, with a reduced proportion of  
215 CD62L<sup>+</sup>CD44<sup>-</sup> naïve T<sub>regs</sub>, and an increased proportion of CD62L<sup>-</sup>CD44<sup>+</sup> effector and  
216 CD62L<sup>+</sup>CD44<sup>+</sup> memory T<sub>regs</sub> (Figure 3G). The expression of Ki67, TIGIT, KLRG1, CD62L and  
217 CD44 were unchanged in the RAGE KO cohort following sRAGE therapy (Figure 3H).  
218 Collectively, these data show that the activation and expansion of T<sub>regs</sub> by sRAGE is dependent  
219 on cellular RAGE expression, which improves the balance of CD4<sup>+</sup>CD8<sup>-</sup>CD25<sup>+</sup>Foxp3<sup>+</sup> T<sub>regs</sub> to  
220 T<sub>eff</sub> cells in mice.

221 **Targeted Reduction of Advanced Glycation End Products (AGEs) by sRAGE**

222 sRAGE binds a variety of ligands implicated in the pathogenesis of T1D (Leung et al., 2016)  
223 including the heterogeneous class of compounds named advanced glycation end products  
224 (AGEs), high mobility group box 1 protein (HMGB1) and S100 calgranulins. To test if sRAGE  
225 resulted in a targeted reduction of a particular ligand, we analyzed circulating concentrations of  
226 these ligands in NOD/ShiLt mice. On day 64, immediately after sRAGE treatment, there were no  
227 changes in the circulating concentrations of AGEs, including N $\epsilon$ -(carboxymethyl)lysine (CML),  
228 N $\epsilon$ -(carboxyethyl)lysine (CEL) or methylglyoxal-derived hydroimidazolone (MG-H1; Table 1).  
229 There were also no differences in the circulating AGE precursors methylglyoxal (MGO), glyoxal  
230 (GO) or 3-deoxyglucosone (3-DG), immediately following sRAGE treatment (Table 1).

Mater Medical Research Institute Limited - Confidential

231 However, on day 225, all plasma AGE concentrations were decreased in the sRAGE treated  
232 group (vs. vehicle; Table 1). Plasma concentrations of other RAGE ligands, S100A8, S100A9,  
233 S100B and HMGB1 did not differ between sRAGE and vehicle treated groups on either day 64  
234 or 225 (Table 1). These findings support the hypothesis that sRAGE treatment results in a  
235 targeted long-term reduction in the circulating ligand AGEs, which is associated with protection  
236 against diabetes.

237 **Islet Insulin and T<sub>reg</sub> Proportions are Increased after sRAGE Treatment**

238 We hypothesized that sRAGE could also increase the proportion of T<sub>regs</sub> within pancreatic  
239 islets, thereby providing local immunoregulation and a direct improvement in insulin expression.  
240 We tested this by multiplexed immunofluorescence staining of pancreatic tissues in NOD/ShiLt  
241 mice, which showed that CD3<sup>+</sup>CD4<sup>+</sup>FoxP3<sup>+</sup> T<sub>reg</sub> proportions were increased on both day 64 and  
242 225 in the sRAGE treated mice (Figure 4A and 4C). Similarly, we observed an improvement in  
243 insulin expression on both days 64 and 225 following sRAGE treatment (Figure 4B and 4C).  
244 These improvements in insulin expression were significantly correlated with the proportion of  
245 islet T<sub>regs</sub> (Figure 4D), highlighting the importance of T<sub>reg</sub> modulation in improving insulin  
246 expression.

247 Finally, we performed oral glucose tolerance tests (OGTTs) to assess if these improvements  
248 in insulin expression would translate into functional improvements in glucose control. The  
249 improvements in oral glucose tolerance emerged gradually, with no differences evident on day  
250 64 (Figure S5A-S5E), an increase in insulin secretion seen prediabetes on day 80 (Figure S5F-  
251 S5J), and a marked improvement in glucose control and insulin action seen on day 225 (Figure  
252 4E-4I). Specifically, on day 225, sRAGE treated mice had significantly lower fasting blood  
253 glucose levels before the oral glucose bolus (vs. vehicle; Figure 4E), as well as lowered blood

Mater Medical Research Institute Limited - Confidential

254 glucose concentrations at 15, 60 and 120 minutes post-glucose bolus (vs. vehicle; Figure 4E).  
255 While the area under the curve for glucose ( $AUC_{\text{glucose}}$ ), plasma insulin and the  $AUC_{\text{insulin}}$  did not  
256 differ on day 225 (Figure 4F-4H), the  $AUC_{\text{glucose:insulin}}$  ratio, an indicator of insulin effectiveness,  
257 was significantly lower in sRAGE treated mice (Figure 4I), suggesting an improvement in  
258 insulin action. Altogether, these findings demonstrate that sRAGE increases  $T_{\text{regs}}$  and insulin  
259 expression in the pancreatic islets, resulting in a persisting functional improvement in oral  
260 glucose tolerance by the study end.

261 **sRAGE Promotes the Proliferation of Functional Human Natural  $T_{\text{regs}}$  ( $nT_{\text{regs}}$ ) in Co-**  
262 **Culture**

263 The circulating RAGE ligand, AGEs, are independent predictors for the development of T1D  
264 in humans (Beyan et al., 2012) and sRAGE treatment led to a targeted decrease in circulating  
265 AGEs (Table 1). Therefore, we hypothesized that AGEs directly bind human  $T_{\text{regs}}$ , influencing  
266 their proliferation and function. To this end, freshly isolated  $CD3^+CD3^+CD25^+CD127^{\text{lo/-}}$  human  
267  $T_{\text{regs}}$  (Figure S6A and S6B), of which  $90.2 \pm 7.1\%$  were positive for FoxP3 (Figure S6C and  
268 S6D), were incubated with fluorescently labelled AGEs. These cells showed a time-dependent  
269 increase in cellular fluorescence intensity (Figure 5A), indicative of binding and cellular uptake.  
270 By contrast, co-administration of neutralizing anti-RAGE antibodies abrogated cellular  
271 fluorescence from labelled AGEs (Figure 5A), suggesting that a significant amount of AGEs  
272 bind to human  $T_{\text{regs}}$  in a RAGE-dependent manner. Human  $T_{\text{regs}}$  incubated with fluorescently  
273 labelled human serum albumin (HSA) also had less cellular fluorescence, as compared with  $T_{\text{regs}}$   
274 incubated with AGEs, supporting the idea that AGE binding to human  $T_{\text{regs}}$  occurs is a RAGE  
275 specific mechanism (Figure 5A).

Mater Medical Research Institute Limited - Confidential

276 We tested the effects of sRAGE on various conditions conducive to the proliferation or  
277 generation of human  $T_{\text{regs}}$  *ex vivo*. First, we co-cultured  $CD3^+CD4^+CD25^+CD127^{\text{lo/-}}$  natural  $T_{\text{regs}}$   
278 ( $nT_{\text{regs}}$ ) and  $CD3^+CD4^+CD25^-$   $T_{\text{convs}}$  obtained by FACS from fresh human PBMCs (Figure S6),  
279 and labeled with CFSE or CellTrace Violet respectively, in the presence of the RAGE ligand  
280 AGEs, with or without sRAGE treatment (Figure 5B). Here, we found that sRAGE accelerated  
281  $nT_{\text{reg}}$  proliferation whilst decreasing the proliferation index of  $T_{\text{convs}}$  (Figure 5B-5D). These  
282 effects occurred through PI3K-Akt-mTOR signaling since the addition of wortmannin and  
283 triciribine, inhibitors of this pathway, resulted in dose-dependent quenching of  $nT_{\text{reg}}$  proliferation  
284 (Figure 5B-5D). This is consistent with previous findings that show the proliferation of  $nT_{\text{regs}}$   
285 requires PI3K-Akt-mTOR activation (Wang et al., 2011). Similarly, the proliferation of sRAGE  
286 treated  $T_{\text{conv}}$  cells was further decreased in the presence of wortmannin and triciribine (Figure  
287 5B-5D). Altogether, this data supports a role for sRAGE in promoting  $nT_{\text{reg}}$  proliferation in co-  
288 culture.

289 We also tested if sRAGE could promote the generation of induced  $T_{\text{regs}}$  ( $iT_{\text{regs}}$ ). Here,  
290  $CD3^+CD4^+CD45RA^+CD45RO^-$  naïve human T cells were isolated (Figure S7A and S7B),  
291 stimulated as previously described (Ellis et al., 2012) in the presence of AGEs and analyzed for  
292  $iT_{\text{reg}}$  differentiation (Figure S7C-S7E). In these conditions, sRAGE treatment led to a reduction  
293 in  $iT_{\text{reg}}$  generation (Figure S8), which suggests the differentiation of  $iT_{\text{regs}}$  does not contribute to  
294 increasing the overall population of  $T_{\text{regs}}$  after sRAGE treatment.

295 **AGEs Promote Human  $nT_{\text{reg}}$  Proliferation in Monoculture but Inhibit Suppressive**  
296 **Function**

297 To further investigate the hypothesis that sRAGE maintains the proliferative balance between  
298  $nT_{\text{regs}}$  and  $T_{\text{convs}}$ , we performed  $nT_{\text{reg}}$  monoculture experiments in the presence of AGEs with or

Mater Medical Research Institute Limited - Confidential

299 without sRAGE administration (Figure 5E). Here, we found that sRAGE increased the mean  
300 fluorescence intensity (MFI) of CFSE labeled nT<sub>regs</sub> (vs. vehicle; Figure 5E and 5F), suggesting  
301 that sRAGE inhibits the proliferation of nT<sub>regs</sub> when other T cell populations are absent. This  
302 finding is consistent with previous studies where RAGE KO inhibits T<sub>conv</sub> proliferation (Chen et  
303 al., 2008). To the best of our knowledge, however, there are no studies showing a role for RAGE  
304 in nT<sub>reg</sub> proliferation. Here, our data supports a role for the RAGE ligand, AGEs, in promoting  
305 the proliferation of nT<sub>regs</sub> cultured in isolation.

306 However, proliferation of nT<sub>regs</sub> can be associated with a loss of suppressive function  
307 (Gerriets et al., 2016; Putnam et al., 2009), so we postulated that although AGEs induce the  
308 proliferation of nT<sub>regs</sub> in the absence of other T cell populations, they limit their function. To test  
309 this, we performed human nT<sub>reg</sub> monoculture experiments and quantified changes in gene  
310 expression using NanoString. Principal component analyses (PCA) distinctively separated the  
311 HSA (control) and AGE treated nT<sub>regs</sub> (Figure 6A), particularly along principal component 1  
312 (PC1) that accounted for 56% of the variance overall. HSA treated nT<sub>regs</sub> were enriched in the  
313 expression of genes involved in nT<sub>reg</sub> function (*JAK1*, *IRF4*, *SOCS1*; Figure 6A) (Cretney et al.,  
314 2011; Kirken et al., 1995; Takahashi et al., 2017), while AGE treatment decreased the expression  
315 of these functional nT<sub>reg</sub> genes.

316 Differentially expressed genes were visualized by volcano plot (Figure 6B) where we found  
317 that AGE treated nT<sub>regs</sub> had reduced expression of key nT<sub>reg</sub> genes including *FOXP3*, *IL7R*,  
318 *TIGIT* and *STAT5b* (Cohen et al., 2006), as well as several other genes that promote nT<sub>reg</sub>  
319 function (*BACH2*, *CD96*, *IL10RA*, *JAK1/3*, *ITK*, *CD27*, *IRF4*, *STAT3/6*, *CD226*) (Chaudhry et  
320 al., 2011; Cretney et al., 2011; Duggleby et al., 2007; Fuhrman et al., 2015; Huang et al., 2014;  
321 Kirken et al., 1995; Pallandre et al., 2007; Piedavent-Salomon et al., 2015; Roychoudhuri et al.,

Mater Medical Research Institute Limited - Confidential

322 2013; Sanchez-Guajardo et al., 2007) and migration (*CCR4*, *AHR*) (Gobert et al., 2009; Ye et al.,  
323 2017). Interestingly, AGE treated nT<sub>regs</sub> also had changes in the expression of granzymes A/B/K  
324 and granulysin (*GZMB*, *GZMB*, *GZMK*, *GNLY*) and decreased expression of *EOMES* (Figure  
325 6B), a marker for T cell exhaustion.

326 Pathway enrichment analysis of genes downregulated by AGEs identified significant  
327 biological pathways including interleukin 7 and interleukin 2 family signaling, JAK/STAT  
328 signaling pathway, as well as the PDGF/EGFR signaling pathways (Figure 6C) that all play a  
329 role in maintaining nT<sub>reg</sub> function (Lo Re et al., 2011; Wang et al., 2016). Ingenuity Pathway  
330 Analysis predicted 161 statistically significant upstream regulators associated with the changes  
331 in gene expression caused by AGE treatment (Figure 6D and Table S1). Of interest, the top ten  
332 upstream regulators included key nT<sub>reg</sub> signaling molecules (*CD28*, *IL2*, *CD3*, *STAT3*, TCR) as  
333 well as other T cell associated proteins (*IL4*, *TBX21*, *NPC2*, *CEBPB*, *GATA3*; Figure 6D). These  
334 data are consistent with a role for the RAGE ligand, AGEs, in influencing crucial nT<sub>reg</sub> signaling  
335 cascades. Finally, we performed network analysis, focusing on the most statistically significant  
336 network (Table S2), which identified neighboring nodes for *FOXP3* and several genes upstream  
337 (*IL10RA*, *STAT3/5B*, *NFATC2*) and downstream (*IL7R*, *CCR4*) of *FOXP3*, which were changed  
338 in expression following AGE treatment (Figure 6E). Predicted upstream regulators after AGE  
339 treatment (*CD3*, TCR; Figure 6D) were also neighboring nodes with *FOXP3* (Figure 6E). All  
340 other genes were either two or three nodes adjacent of *FOXP3* (Figure 6E), highlighting the  
341 intimate cross-talk amongst genes influenced by AGEs and the nT<sub>reg</sub> master regulatory gene  
342 *FOXP3*.

343 These data provide strong evidence that despite promoting human nT<sub>reg</sub> proliferation in the  
344 absence of other T cell populations, AGE treatment results in a loss of suppressive function.



Mater Medical Research Institute Limited - Confidential

345 These functional defects can be rescued by the competitive RAGE antagonist sRAGE in co-  
346 culture where it expands functional human nT<sub>regs</sub> that suppress T<sub>conv</sub> proliferation. Taken together  
347 with the efficacy of sRAGE to expand T<sub>regs</sub> and prevent diabetes in mice, we propose that  
348 sRAGE therapy should be tested in at-risk individuals to prevent the onset of T1D.

Mater Medical Research Institute Limited - Confidential

## 349 **Discussion**

350 There is an urgent unmet need for novel disease targets and treatments that are reproducible  
351 and have high potential to be translated to prevent T1D in humans (Insel et al., 2015). Here, we  
352 report that a RAGE antagonist sRAGE has a novel immunomodulatory role where it maintains  
353 the balance between  $T_{\text{regs}}$  and  $T_{\text{effs}}$ , a critical process in self-tolerance (Brusko et al., 2005). We  
354 show that sRAGE treatment in several mouse models resulted in increased  $T_{\text{reg}}$  ratios in the PLN  
355 and spleen, which are lymphoid tissues that have both been implicated in the pathogenesis of  
356 diabetes (McNally et al., 2011), as well as within the pancreatic islet immune cell infiltrate.  
357 Using human T cell culture, we found that sRAGE promoted the expansion of functional human  
358  $nT_{\text{regs}}$ , whereas the RAGE ligand AGEs significantly impaired their suppressive function.  
359 Ultimately, we show that short-term intervention with sRAGE restored  $T_{\text{reg}}/T_{\text{eff}}$  ratios, protecting  
360 against diabetes onset at two independent research centers.

361 Immediately after sRAGE therapy on day 64, islet infiltration was reduced, which was  
362 accompanied by increases in the absolute numbers of  $T_{\text{regs}}$  as well as  $T_{\text{reg}}/T_{\text{eff}}$  ratios in the PLN.  
363 These changes in the PLN are critical for islet preservation and arresting disease progression,  
364 since  $T_{\text{regs}}$  localized here suppress the priming of autoantigen specific T cells (McNally et al.,  
365 2011), which would otherwise infiltrate the pancreatic islets. The transient increase in PLN  
366 leukocytes is consistent with previous work where sRAGE showed immunomodulatory effects  
367 on monocytes, macrophages and B cells (Pullerits et al., 2006). Here, we also found an increase  
368 in macrophage numbers following sRAGE treatment on day 64. Further investigation into their  
369 phenotype is warranted since changes in the macrophage transcriptome associates with T1D  
370 (Ferris et al., 2017). Interestingly, we report increased numbers of dendritic cell subsets within  
371 the spleen, but not the PLN, suggesting that they are not significant contributors in the expansion

Mater Medical Research Institute Limited - Confidential

372 of  $T_{\text{regs}}$  within the major draining lymphoid tissue in T1D. In support of this, we also delineated  
373 that the modulation of  $T_{\text{regs}}$  specifically, using anti-FR4 antibodies to deplete  $T_{\text{regs}}$ , is critical for  
374 the protection afforded against diabetes by sRAGE.  $T_{\text{reg}}$  immunomodulation comparable to this  
375 has also been seen with other interventions that are lead candidates for the treatment of T1D  
376 (Sherry et al., 2011). Further development of sRAGE therapy to optimize the dosing regimen and  
377 therapeutic window is likely to result in even more efficacious outcomes, which will facilitate its  
378 competition with the current lead candidate agents. We also acknowledge that recombinant  
379 human sRAGE is unlikely to be immunogenic since it is an endogenous protein, but it would be  
380 worthwhile investigating if RAGE-specific autoantibodies were produced as a result of this  
381 treatment.

382 By day 80, islet infiltration was modestly increased in sRAGE treated mice, which could  
383 reflect differences in the type of infiltrating immune cells present. Indeed, it is likely that there  
384 are increased numbers of infiltrating  $T_{\text{regs}}$  at this time point in sRAGE treated mice, but we  
385 highlight that this remains untested. In support of this hypothesis, we found that sRAGE  
386 treatment had increased the proportion of  $T_{\text{regs}}$  in the islets on days 64 and 225, which associated  
387 with reduced islet infiltration by the study end. By day 225, sRAGE treatment had also improved  
388 oral glucose tolerance and insulin expression to preserve pancreatic islet numbers, which reflects  
389 the protection against diabetes (Sosenko et al., 2012). Given that early short-term intervention  
390 with sRAGE improved the balance of  $T_{\text{regs}}$ , imparting persistent improvements in autoimmunity  
391 and glycemic control, this therapy shows promise in preventing the onset of clinical T1D.

392 Mice deficient in RAGE could not increase  $T_{\text{reg}}/T_{\text{eff}}$  cell ratios within lymphoid tissues  
393 following sRAGE intervention, which alludes to the importance of cellular RAGE antagonism  
394 for the mechanism of this therapy. RAGE plays an important role in T cell survival (Durning et

Mater Medical Research Institute Limited - Confidential

395 al., 2016) and proliferation (Chen et al., 2008), including in individuals at-risk of T1D, but there  
396 has been no delineation as to whether this applies to specific T cell subsets such as  $T_{\text{regs}}$ .  
397 Furthermore, there is no data examining whether RAGE impacts  $T_{\text{reg}}$  function. In the current  
398 study, we confirmed the expression of RAGE on  $T_{\text{regs}}$  in the PLN and spleen of NOD/ShiLt mice  
399 and found that sRAGE treatment improved localized  $T_{\text{reg}}/T_{\text{eff}}$  ratios after therapy completion. In  
400 the long-term, sRAGE treated mice had reduced circulating concentrations of the heterogeneous  
401 class of RAGE ligands termed AGEs, including CML, CEL and MG-H1, and increased splenic  
402  $T_{\text{reg}}/T_{\text{eff}}$  cell ratios. Similarly, sRAGE increased  $T_{\text{reg}}/T_{\text{eff}}$  ratios, as well as the expression of the  
403  $T_{\text{reg}}$  activation markers Ki67, TIGIT, KLRG1 and CD44, in wild-type C57BL/6 but not RAGE  
404 KO mice. It was noteworthy that RAGE KO mice did not have changes in  $T_{\text{reg}}/T_{\text{eff}}$  ratios as  
405 compared with WT mice prior to sRAGE treatment. This could suggest that long-term depletion  
406 of RAGE leads to the normalization of  $T_{\text{reg}}/T_{\text{eff}}$  ratios, potentially by compensatory signaling  
407 through receptors which share ligands with RAGE such as toll-like receptors (TLRs). In support  
408 of this, crosstalk between RAGE and TLRs has been found to synergistically drive inflammation  
409 via NF- $\kappa$ B (Gasiorowski et al., 2018). However, as alluded to in this study, the function of T  
410 cells and  $T_{\text{regs}}$  in RAGE KO mice may be compromised.

411 In children who progress to T1D, circulating sRAGE concentrations are decreased prediabetes  
412 (Forbes et al., 2011; Salonen et al., 2015; Salonen et al., 2016) and increases in the RAGE ligand  
413 AGEs are independent predictors of progression to T1D (Beyan et al., 2012). To this end, short-  
414 term sRAGE treatment facilitated long-lived decreases in circulating protein-bound AGEs  
415 (CML, CEL and MG-H1), alongside improved insulin expression and action in mice. We also  
416 demonstrated that AGEs promoted human  $nT_{\text{reg}}$  proliferation when these cells were cultured  
417 alone but this resulted in significant impairment of  $nT_{\text{reg}}$  function. By contrast, sRAGE treatment

Mater Medical Research Institute Limited - Confidential

418 led to the expansion of functional human nT<sub>regs</sub>, since sRAGE increased the proliferation of  
419 nT<sub>regs</sub> that could inhibit T<sub>conv</sub> cell division in co-culture.

420 We highlight the importance for future studies to perform the functional assays presented in  
421 this study not only using healthy human T<sub>regs</sub>, but also in T cells obtained from individuals with  
422 presymptomatic and overt T1D, to expand our knowledge about the role of RAGE in T<sub>reg</sub>  
423 function in this disease context. Furthermore, the use of tetramer complexes could help confirm  
424 if the effects observed on T cells in this study translate to changes in the numbers and function of  
425 autoantigen-specific T cells and T<sub>regs</sub> that are known to affect T1D pathogenesis. Finally, the use  
426 of humanized mice with human umbilical cord blood stem cells or bone marrow, liver and  
427 thymus (“BLT”) transplants could further progress the therapeutic development of sRAGE by  
428 demonstrating its efficacy using an *in vivo* human immune system. Overall, RAGE and RAGE  
429 ligand biology clearly require further interrogation to better understand their contribution to  
430 antigen-specific T cell and T<sub>reg</sub> responses in T1D.

431 In summary, we have shown that sRAGE is an immunomodulatory compound and is an  
432 important factor in balancing T<sub>reg</sub> responses to their environment, including through the RAGE  
433 ligand AGEs. This was ascertained using human T cell assays as well as using murine models  
434 that were RAGE deficient or at high-risk of autoimmune diabetes, where the presence of  
435 functional T<sub>regs</sub> is known to be compromised. We showed that a short-term two-week  
436 intervention with sRAGE elicited persistent effects on the immune system, ultimately preserving  
437  $\beta$  cell function and reducing diabetes incidence in a multi-site preclinical trial. Given that  
438 sRAGE is a native protein that is reduced in children at risk of T1D, and has persistent benefits  
439 on insulin expression, oral glucose tolerance and T<sub>reg</sub>/T<sub>eff</sub> ratios, we suggest that this treatment is  
440 a promising new therapy for further development to prevent T1D.

Mater Medical Research Institute Limited - Confidential

441 **Materials and Methods**

442 **Mice**

443 Female NOD/ShiLt mice were housed in specific pathogen-free conditions at two independent  
444 research centers – Site 1, Translational Research Institute, Brisbane, Australia; and Site 2, Type 1  
445 Diabetes Research Center, Novo Nordisk, Seattle, US. Mice were sourced from The Animal  
446 Resources Centre (Canning Vale, Australia; Site 1) or The Jackson Laboratory (Sacramento, CA,  
447 US; Site 2), and were provided free access to irradiated diet (Site 1, Specialty Feeds Rat and  
448 Mouse Diet; Site 2, Purina Lab Diet 5053) and water (Site 1, autoclaved; Site 2, filtered). Sample  
449 size calculations were performed using  $\alpha = 0.05$  and a power of 0.80, where 80% of the control  
450 mice were expected to develop diabetes by the study end as per historical data available in the  
451 animal facilities.

452 Female NOD/SCIDs, wild-type C57BL/6 and RAGE KO C57BL/6 (Liliensiek et al., 2004)  
453 mice were housed at Site 1. Animal studies were approved at both sites by their respective  
454 institutional ethics committees and adhered to national guidelines by the National Health and  
455 Medical Research Council (NHMRC, Australia) and NIH (US).

456 **Human Samples**

457 Human whole blood specimens were obtained by venipuncture using citrate-phosphate-  
458 dextrose-adenine or EDTA anti-coagulants and transported to the laboratory within 1-2 hours.  
459 Human donors were healthy volunteers, 18-65 years of age and provided informed consent.  
460 Experiments were approved by the Mater Ethics Committee.

461 **sRAGE Therapy**

462 Randomized mice were intraperitoneally injected on days 50-64 of life with 100  $\mu$ L  
463 recombinant human sRAGE (25  $\mu$ g) twice daily (Sites 1 and 2), vehicle (PBS) twice daily (Site

Mater Medical Research Institute Limited - Confidential

464 1), sRAGE (100 µg) once daily (Site 2), or untreated (Site 2). Treatment dosages was based on  
465 previous studies using sRAGE, which were able to detect changes in end points using 25-100 µg  
466 sRAGE per day (Pullerits et al., 2006; Wang et al., 2010). Recombinant sRAGE was produced  
467 using an insect cell and baculovirus expression system with the cloned sequence for human  
468 endogenous secretory RAGE (esRAGE; from herein, sRAGE). Recombinant sRAGE was  
469 isolated using size exclusion and affinity chromatography, and protein purity determined to be  
470 >99% by SDS-PAGE and Western Blot. Endotoxin levels were 0.065 EU/mg (0.00325 EU/day  
471 and 0.0065 EU/day for 25 µg twice daily and 100 µg once daily dosages, respectively) as  
472 determined by limulus amebocyte lysate (LAL) assay.

473 Mice were fasted for 4-6 h and euthanized on day 64, 80 or for non-progressors on 225 of  
474 life. Non-fasted blood glucose concentrations were measured weekly using a glucometer (Site 1,  
475 SensoCard; Site 2, Bayer Contour USB) between days 50-225. Diabetes was diagnosed when  
476 this exceeded 15 mmol/L on consecutive days at which point these progressors left the study.

#### 477 **Adoptive Transfer**

478 Splenocytes ( $10^7$ ) from untreated female NOD/ShiLt mice diagnosed with diabetes within  
479 seven days were intravenously injected (200µL) into 5-9 week old female NOD/SCID recipients  
480 (Leiter, 2001). Briefly, splenocytes were mechanically dissociated using 70µm filters, red cell  
481 lysis performed using ammonium-chloride-potassium (ACK) buffer (ThermoFisher) and  
482 splenocytes washed several times into serum-free mouse-tonicity PBS (MT-PBS) for injection *in*  
483 *vivo*. Randomized NOD/SCID mice were then administered the following treatments for two  
484 weeks post-adoptive transfer: (i) PBS and rat isotype control IgG2b antibodies (RTK4530;  
485 BioLegend), (ii) PBS and anti-FR4 antibodies (TH6; BioLegend) for the depletion of T<sub>regs</sub> via  
486 their selective expression of FR4 (Yamaguchi et al., 2007), (iii) sRAGE and isotype control

Mater Medical Research Institute Limited - Confidential

487 antibodies, or (iv) sRAGE and anti-FR4 antibodies. PBS and sRAGE (25  $\mu$ g) were given twice  
488 daily, as above. Isotype control and anti-FR4 antibodies (10  $\mu$ g for both) were given on days 0,  
489 3, 7, 10 and 14, and endotoxin levels were  $<0.01$  EU/ $\mu$ g ( $<0.1$  EU/injection) as determined by  
490 LAL assay. Diabetes was monitored and diagnosed as above.

491 **Oral Glucose Tolerance Tests (OGTTs)**

492 Mice were fasted for 4-6 h and administered a 2 g/kg glucose bolus by intragastric gavage. At  
493 0, 15, 30, 60 and 120 min post-glucose bolus, blood glucose and plasma insulin were measured  
494 by glucometer and ELISA (Crystal Chem), respectively.

495 **RAGE Ligand Assays**

496 Fasting plasma S100A8/A9 (R&D DuoSet), S100B (Abxexa), and HMGB1 (Shino-Test)  
497 were measured by ELISA. Circulating AGEs and dicarbonyls were measured by liquid  
498 chromatography-tandem mass spectrometry (LC-MS/MS) as previously described (Scheijen and  
499 Schalkwijk, 2014).

500 **Islet Histology and Immunofluorescence Staining**

501 Formalin fixed tissue sections (4-5 $\mu$ m) were deparaffinized and rehydrated using standard  
502 techniques, then stained with H&E, coverslipped in DPX and imaged on the VS1200 brightfield  
503 microscope (Olympus). Islet infiltration was assessed in a blinded fashion using an islet  
504 infiltration index from 0 to 1 (no infiltration to complete infiltration), and individual islets graded  
505 as 0, 1, 2, 3 or 4 (no infiltration to  $>75\%$  infiltration) as previously described.

506 For multiplexed immunofluorescence staining, antigen retrieval was performed using sodium  
507 citrate buffer (pH 6). Non-specific binding was blocked using 10% donkey serum at room  
508 temperature for 1 hour, then sections were incubated with rabbit anti-CD3 (SP7, Abcam), goat



Mater Medical Research Institute Limited - Confidential

509 anti-CD4 (#AF554, polyclonal; R&D Systems) and biotinylated anti-FoxP3 (FJK-16s;  
510 eBioscience) antibodies overnight at 4°C, followed by incubation with anti-rabbit IRDye 800CW  
511 (#926-32213; Li-cor Biosciences), anti-goat AlexaFluor568 (#A11057; ThermoFisher), and  
512 streptavidin-AlexaFluor647 (#S32357; ThermoFisher) at room temperature for 1 hour. Sections  
513 were blocked again as described above, then incubated with rat anti-insulin antibody (182410;  
514 R&D Systems) overnight at 4°C, followed by incubation with anti-rat AlexaFluor488 (#A21208)  
515 at room temperature for 1 hour. Sections were coverslipped in Fluoroshield with DAPI and  
516 images captured on the FV1200 confocal microscope (Olympus). Quantification was performed  
517 in a blinded fashion using ImageJ v2.0.0.

518 **Flow Cytometry and Cell Sorting**

519 Mouse spleen and PLN were mechanically dissociated into single cells using 40µm filters and  
520 red cell lysis performed using ACK buffer (ThermoFisher). Blocking was performed using anti-  
521 CD16/CD32 antibodies (BD Biosciences) and cells were stained using antibodies against CD4  
522 (RM4-5, BD Biosciences unless indicated), CD8 (53-6.7), CD11b (M1/70), CD11c (HL3), B220  
523 (RA3-6B2), F4/80 (CI:A3-1; Bio-Rad), CD62L (MEL-14), CD44 (IM7), CD25 (PC61), FoxP3  
524 (FJK-16s, eBioscience), TIGIT (1G9, BioLegend unless indicated), KLRG1 (2F1) and Ki67  
525 (16A8). Samples were analyzed on the LSRII (BD Biosciences) and FlowJo (Tree Star Inc).

526 Human PBMCs were isolated by Ficoll and incubated with antibodies against CD3 (OKT3,  
527 BioLegend unless indicated), CD4 (RPA-T4), CD25 (BC96), CD127 (A019D5) and FoxP3  
528 (PCH101; eBioscience). Dead cells were excluded using a Live/Dead viability dye  
529 (ThermoFisher) and blocking was performed using Human TruStain FcX (BioLegend).  
530 CD3<sup>+</sup>CD4<sup>+</sup>CD25<sup>+</sup>CD127<sup>lo/-</sup> nT<sub>regs</sub> and CD3<sup>+</sup>CD4<sup>+</sup>CD25<sup>-</sup> T<sub>conv</sub>s were isolated on the Astrios  
531 (Beckman Coulter) or FACSARIA (BD Biosciences) and analyzed using FlowJo (>97% nT<sub>reg</sub> and

Mater Medical Research Institute Limited - Confidential

532 T<sub>conv</sub> purity). CD3<sup>+</sup>CD4<sup>+</sup>CD25<sup>+</sup>CD127<sup>lo/-</sup> nT<sub>regs</sub> were 90.2 ± 7.1% FoxP3 positive using human  
533 PBMCs (Figure S6C and S6D), consistent with previous studies which have examined the use of  
534 CD3<sup>+</sup>CD4<sup>+</sup>CD25<sup>+</sup>CD127<sup>lo/-</sup> cells for isolating live, viable nT<sub>regs</sub> for *ex vivo* assays (Putnam et al.,  
535 2009).

536 **Human T Cell Culture**

537 Human nT<sub>regs</sub> were CFSE labelled and cultured in TexMACs (Miltenyi Biotec) supplemented  
538 with 10% heat inactivated fetal bovine serum (HI-FBS, Life Technologies unless indicated), 100  
539 U/mL penicillin-streptomycin, 10 µM β-mercaptoethanol and 100 µg/mL AGE-modified HSA  
540 (AGE-HSA or AGE) at a final number of 2.5x10<sup>4</sup> cells in a U-bottom 96-well plate. T<sub>conv</sub>s were  
541 CellTrace Violet labelled and added to a final number of 2.5x10<sup>4</sup> cells. Cells were stimulated  
542 using anti-CD3/CD28 MACSiBeads at a 1:10 bead-to-cell ratio. Co-cultures were treated with  
543 50 µg sRAGE or PBS daily, for 72 h at 37 °C/5% CO<sub>2</sub>. Proliferation was analyzed using CFSE  
544 and CellTrace Violet dye dilution on the LSRFortessa (BD Biosciences) and FlowJo.

545 CFSE labeled human nT<sub>regs</sub> were also grown in monoculture using TexMACs supplemented  
546 with 10% HI-FBS, 100 U/mL penicillin-streptomycin, 10 µM β-mercaptoethanol and 200 IU/mL  
547 IL-2 at a final number of 2x10<sup>4</sup> cells in a U-bottom 96-well plate. Cells were stimulated using  
548 anti-CD3/CD28 MACSiBeads at a 1:20 bead-to-cell ratio. Cells were treated with 100 µg/mL  
549 HSA or AGEs for 72 h at 37 °C/5% CO<sub>2</sub>, and analyzed as above.

550 For gene expression analysis, unlabeled nT<sub>regs</sub> were grown in monoculture under the  
551 conditions as described above for 72 h and anti-CD3/CD28 MACSiBeads removed by EasySep  
552 Magnet. RNA was isolated using RNAzol RT (Astral Scientific) per manufacturer's instructions  
553 with the use of molecular grade isopropanol and ethanol (Sigma Aldrich) for RNA precipitation.  
554 Briefly, cells were lysed and centrifuged to separate the aqueous phase which contained RNA.

## Mater Medical Research Institute Limited - Confidential

555 Multiple ethanol washes were performed before resuspension of the purified RNA pellet. RNA  
556 quality and quantity were probed using an Implen NanoPhotometer N60 (LabGear). 100 ng RNA  
557 was hybridized overnight using a NanoString Custom CodeSet for 136 T cell specific genes.  
558 Normalization of raw counts was performed using NanoString NSolver software with the  
559 housekeeping genes *ACTB*, *B2M*, *GAPDH*, *HPRT1* and *RPLP0* (panel in Table S3).

560 Naïve CD4<sup>+</sup> T cells were negatively isolated from fresh PBMCs by EasySep (Stem Cell  
561 Technologies; >95% purity). Cells were stimulated (Ellis et al., 2012), treated with 100 µg/mL  
562 AGEs and 50 µg sRAGE or PBS daily for 72 h at 37 °C/5% CO<sub>2</sub>, and analyzed for  
563 CD3<sup>+</sup>CD4<sup>+</sup>CD25<sup>+</sup>CD127<sup>lo/-</sup> iT<sub>reg</sub> differentiation on the LSRFortessa (BD Biosciences) and  
564 FlowJo.

### 565 **AGE-HSA Production**

566 AGE-HSA was produced by incubating 20 mg/mL fatty acid-free, cold ethanol precipitated  
567 human serum albumin (Sigma) and 0.5 M D-(+)-glucose (Sigma) in HyClone PBS (GE  
568 Healthcare) for 3 months at 37°C in the dark. Solutions were dialyzed in PBS (GE Healthcare) with  
569 10K MWCO Slide-A-Lyzer Cassettes (ThermoFisher), 0.22 µm filtered and stored at -80°C.

570 Endotoxins were determined to be <1 EU/mL (<0.005 EU/mL at final concentrations in human cell  
571 culture experiments) by Limulus Amebocyte Lysate Assay. Quantification of AGE-HSA glycation  
572 adducts – RAGE ligands – was performed using LC-MS/MS as described above, producing the  
573 following concentrations: 646,568 nM CML, 45,279 nM CEL and 198,454 nM MG-H1 (28-, 22- and 11-  
574 fold increases in glycation adduct concentrations respectively, as compared with unmodified HSA).

### 575 **Human nT<sub>reg</sub> Binding Assay**

576 Human nT<sub>regs</sub> were stained using Hoechst 33342 (ThermoFisher) and cultured in phenol-free  
577 RPMI-1640 (ThermoFisher) in glass chambers and administered 100 µg/mL HSA-

Mater Medical Research Institute Limited - Confidential

578 AlexaFluor488, AGE-AlexaFluor488, or AGE-AlexaFluor488 and anti-RAGE antibody  
579 (#AB5484, Merck) for the durations indicated. Cells were imaged on the FV1200 confocal  
580 microscope and quantification was performed in a blinded fashion using ImageJ.

581 **Quantification and Statistical Analysis**

582 Statistical analyses were performed using GraphPad v5.01 and  $P < 0.05$  was considered  
583 statistically significant. Comparisons were done using biological not technical replicates which  
584 are shown in all figures. Normality was tested by Kolmogorov-Smirnov test. Means were  
585 compared by two-tailed Student's t-test and shown as mean  $\pm$  SD. Medians were compared by  
586 two-tailed Mann-Whitney U-test and shown as median (IQR). Kaplan-Meier survival curves  
587 were compared by log-rank test. Regression lines were compared by ANCOVA. Proportions  
588 were compared by Fischer's test. Gene expression was analyzed using R v.3.4.4 for PCA and  
589 volcano plots, DAVID v.6.8 for Reactome Pathway enrichment, PANTHER v.14.0 for Gene  
590 Ontology overrepresentation and Ingenuity Pathway Analysis v.1.14 for identification of  
591 upstream regulators and network analysis ( $P$  values were adjusted using false discovery rate or  
592 Bonferroni).

Mater Medical Research Institute Limited - Confidential

593 **Author Contributions:** SSL designed and performed experiments, analyzed and interpreted data  
594 and prepared the manuscript. DJB, DAMc, AZ, AKF, NF, TW, JJM, JLS and CGS performed  
595 experiments. TEB designed and JC performed the incidence experiment at the second site and  
596 both completed its data analyses and interpretation. KJR assisted with the human study design  
597 and completion. RJS, P-HG, MK, led by JMF conceptualized and designed the overall study,  
598 gained financial support and completed data analyses and interpretation. All authors edited and  
599 approved the final manuscript.

600 **Competing Interests:** P-HG is a board member of AbbVie, AstraZeneca, Boehringer Ingelheim,  
601 Cebix, Eli Lilly, Janssen, Medscape, Novartis, Novo Nordisk and Sanofi. P-HG received lecture  
602 honoraria from AstraZeneca, Boehringer Ingelheim, Eli Lilly, Genzyme, MSD, Novartis, Novo  
603 Nordisk and Sanofi. P-HG received grants from Eli Lilly and Roche. MK is a board member and  
604 minor (<5%) shareholder of Vactech Ltd. MK received lecture honoraria from Novo Nordisk.  
605 TEB and JC received income and research support from Novo Nordisk.

606 **Funding:** This work was supported by the NHMRC (1023661), JDRF (5-2010-163), Diabetes  
607 Australia, The Victorian Government Infrastructure Program and Mater Foundation. SSL was  
608 supported by the Research Training Program and JDRF; AKF and NF by the Research Training  
609 Program; AZ by Kidney Health Australia; RJS by an ARC Fellowship (FT110100372); and JMF  
610 by NHMRC Fellowships (1004503, 1102935).

611 **Acknowledgments:** The authors thank I. Rojas and S. Diaz-Guilas for assistance with human  
612 cell culture; C. O'Brien and T. Friesen for assistance with the incidence study at Site 2; I.  
613 Buckle, J. Naranjo and E. Hamilton-Williams for providing diabetic NODs for the adoptive  
614 transfer; J. Lynch and S. Phipps for providing RAGE KO mice for exploratory analyses; K.  
615 MacDonald for feedback on T<sub>reg</sub> experiments; E. Williams and the Australian Equine Genetics

Mater Medical Research Institute Limited - Confidential

- 616 Research Centre for assistance with the RAGE KO mice; and the Biological Resources, Flow  
617 Cytometry, Histology and Microscopy facilities at the Translational Research Institute.

Mater Medical Research Institute Limited - Confidential

618 **References**

- 619 Alhadj Ali, M., Liu, Y.F., Arif, S., Tatovic, D., Shariff, H., Gibson, V.B., Yusuf, N., Baptista, R.,  
620 Eichmann, M., Petrov, N., et al. (2017). Metabolic and immune effects of immunotherapy with  
621 proinsulin peptide in human new-onset type 1 diabetes. *Sci. Transl. Med.* *9*.
- 622 Atkinson, M.A., Eisenbarth, G.S., and Michels, A.W. (2014). Type 1 diabetes. *Lancet* *383*, 69-  
623 82.
- 624 Beyan, H., Riese, H., Hawa, M.I., Beretta, G., Davidson, H.W., Hutton, J.C., Burger, H.,  
625 Schlosser, M., Snieder, H., Boehm, B.O., et al. (2012). Glycotoxin and autoantibodies are  
626 additive environmentally determined predictors of type 1 diabetes: a twin and population study.  
627 *Diabetes* *61*, 1192-1198.
- 628 Brusko, T.M., Wasserfall, C.H., Clare-Salzler, M.J., Schatz, D.A., and Atkinson, M.A. (2005).  
629 Functional defects and the influence of age on the frequency of CD4<sup>+</sup> CD25<sup>+</sup> T-cells in type 1  
630 diabetes. *Diabetes* *54*, 1407-1414.
- 631 Chaudhry, A., Samstein, R.M., Treuting, P., Liang, Y., Pils, M.C., Heinrich, J.M., Jack, R.S.,  
632 Wunderlich, F.T., Bruning, J.C., Muller, W., et al. (2011). Interleukin-10 signaling in regulatory  
633 T cells is required for suppression of Th17 cell-mediated inflammation. *Immunity* *34*, 566-578.
- 634 Chen, Y., Akirav, E.M., Chen, W., Henegariu, O., Moser, B., Desai, D., Shen, J.M., Webster,  
635 J.C., Andrews, R.C., Mjalli, A.M., et al. (2008). RAGE ligation affects T cell activation and  
636 controls T cell differentiation. *J. Immunol.* *181*, 4272-4278.
- 637 Cohen, A.C., Nadeau, K.C., Tu, W., Hwa, V., Dionis, K., Bezrodnik, L., Teper, A., Gaillard, M.,  
638 Heinrich, J., Krensky, A.M., et al. (2006). Cutting edge: Decreased accumulation and regulatory  
639 function of CD4<sup>+</sup> CD25<sup>(high)</sup> T cells in human STAT5b deficiency. *J. Immunol.* *177*, 2770-  
640 2774.

Mater Medical Research Institute Limited - Confidential

641 Cretney, E., Xin, A., Shi, W., Minnich, M., Masson, F., Miasari, M., Belz, G.T., Smyth, G.K.,  
642 Busslinger, M., Nutt, S.L., et al. (2011). The transcription factors Blimp-1 and IRF4 jointly  
643 control the differentiation and function of effector regulatory T cells. *Nat Immunol* *12*, 304-311.  
644 Das, N., Dewan, V., Grace, P.M., Gunn, R.J., Tamura, R., Tzarum, N., Watkins, L.R., Wilson,  
645 I.A., and Yin, H. (2016). HMGB1 Activates Proinflammatory Signaling via TLR5 Leading to  
646 Allodynia. *Cell reports* *17*, 1128-1140.  
647 Duggleby, R.C., Shaw, T.N., Jarvis, L.B., Kaur, G., and Gaston, J.S. (2007). CD27 expression  
648 discriminates between regulatory and non-regulatory cells after expansion of human peripheral  
649 blood CD4+ CD25+ cells. *Immunology* *121*, 129-139.  
650 Durning, S.P., Preston-Hurlburt, P., Clark, P.R., Xu, D., Herold, K.C., and Type 1 Diabetes  
651 TrialNet Study Group (2016). The Receptor for Advanced Glycation Endproducts Drives T Cell  
652 Survival and Inflammation in Type 1 Diabetes Mellitus. *J. Immunol.* *197*, 3076-3085.  
653 Ellis, G.I., Reneer, M.C., Velez-Ortega, A.C., McCool, A., and Marti, F. (2012). Generation of  
654 induced regulatory T cells from primary human naive and memory T cells. *Journal of visualized*  
655 *experiments : JoVE*.  
656 Ferris, S.T., Zakharov, P.N., Wan, X., Calderon, B., Artyomov, M.N., Unanue, E.R., and  
657 Carrero, J.A. (2017). The islet-resident macrophage is in an inflammatory state and senses  
658 microbial products in blood. *J. Exp. Med.* *214*, 2369-2385.  
659 Forbes, J.M., Soderlund, J., Yap, F.Y., Knip, M., Andrikopoulos, S., Ilonen, J., Simell, O.,  
660 Veijola, R., Sourris, K.C., Coughlan, M.T., et al. (2011). Receptor for advanced glycation end-  
661 products (RAGE) provides a link between genetic susceptibility and environmental factors in  
662 type 1 diabetes. *Diabetologia* *54*, 1032-1042.



Mater Medical Research Institute Limited - Confidential

663 Fuhrman, C.A., Yeh, W.I., Seay, H.R., Saikumar Lakshmi, P., Chopra, G., Zhang, L., Perry,  
664 D.J., McClymont, S.A., Yadav, M., Lopez, M.C., et al. (2015). Divergent Phenotypes of Human  
665 Regulatory T Cells Expressing the Receptors TIGIT and CD226. *J. Immunol.* *195*, 145-155.  
666 Gasiorowski, K., Brokos, B., Echeverria, V., Barreto, G.E., and Leszek, J. (2018). RAGE-TLR  
667 Crosstalk Sustains Chronic Inflammation in Neurodegeneration. *Mol. Neurobiol.* *55*, 1463-1476.  
668 Gerriets, V.A., Kishton, R.J., Johnson, M.O., Cohen, S., Siska, P.J., Nichols, A.G., Warmoes,  
669 M.O., de Cubas, A.A., MacIver, N.J., Locasale, J.W., et al. (2016). Foxp3 and Toll-like receptor  
670 signaling balance Treg cell anabolic metabolism for suppression. *Nat Immunol* *17*, 1459-1466.  
671 Gobert, M., Treilleux, I., Bendriss-Vermare, N., Bachelot, T., Goddard-Leon, S., Arfi, V., Biota,  
672 C., Doffin, A.C., Durand, I., Olive, D., et al. (2009). Regulatory T cells recruited through  
673 CCL22/CCR4 are selectively activated in lymphoid infiltrates surrounding primary breast tumors  
674 and lead to an adverse clinical outcome. *Cancer Res* *69*, 2000-2009.  
675 Herold, K.C., Bundy, B.N., Long, S.A., Bluestone, J.A., DiMeglio, L.A., Dufort, M.J., Gitelman,  
676 S.E., Gottlieb, P.A., Krischer, J.P., Linsley, P.S., et al. (2019). An Anti-CD3 Antibody,  
677 Teplizumab, in Relatives at Risk for Type 1 Diabetes. *N. Engl. J. Med.* *381*, 603-613.  
678 Huang, W., Jeong, A.R., Kannan, A.K., Huang, L., and August, A. (2014). IL-2-inducible T cell  
679 kinase tunes T regulatory cell development and is required for suppressive function. *J. Immunol.*  
680 *193*, 2267-2272.  
681 Insel, R.A., Dunne, J.L., Atkinson, M.A., Chiang, J.L., Dabelea, D., Gottlieb, P.A., Greenbaum,  
682 C.J., Herold, K.C., Krischer, J.P., Lernmark, A., et al. (2015). Staging presymptomatic type 1  
683 diabetes: a scientific statement of JDRF, the Endocrine Society, and the American Diabetes  
684 Association. *Diabetes Care* *38*, 1964-1974.

Mater Medical Research Institute Limited - Confidential

685 Kirken, R.A., Rui, H., Malabarba, M.G., Howard, O.M., Kawamura, M., O'Shea, J.J., and Farrar,  
686 W.L. (1995). Activation of JAK3, but not JAK1, is critical for IL-2-induced proliferation and  
687 STAT5 recruitment by a COOH-terminal region of the IL-2 receptor beta-chain. *Cytokine* 7,  
688 689-700.

689 Laban, S., Suwandi, J.S., van Unen, V., Pool, J., Wesselius, J., Holtt, T., Pezzotti, N., Vilanova,  
690 A., Lelieveldt, B.P.F., and Roep, B.O. (2018). Heterogeneity of circulating CD8 T-cells specific  
691 to islet, neo-antigen and virus in patients with type 1 diabetes mellitus. *PloS One* 13, e0200818.

692 Leiter, E.H. (2001). The NOD mouse: a model for insulin-dependent diabetes mellitus. *Curr.*  
693 *Protoc. Immunol. Chapter 15*, Unit 15 19.

694 Leung, S.S., Forbes, J.M., and Borg, D.J. (2016). Receptor for advanced glycation end products  
695 (RAGE) in type 1 diabetes pathogenesis. *Curr. Diab. Rep.* 16, 100.

696 Liliensiek, B., Weigand, M.A., Bierhaus, A., Nicklas, W., Kasper, M., Hofer, S., Plachky, J.,  
697 Grone, H.J., Kurschus, F.C., Schmidt, A.M., et al. (2004). Receptor for advanced glycation end  
698 products (RAGE) regulates sepsis but not the adaptive immune response. *J. Clin. Investig.* 113,  
699 1641-1650.

700 Lippens, C., Duraes, F.V., Dubrot, J., Brighthouse, D., Lacroix, M., Irla, M., Aubry-Lachainaye,  
701 J.P., Reith, W., Mandl, J.N., and Hugues, S. (2016). IDO-orchestrated crosstalk between pDCs  
702 and Tregs inhibits autoimmunity. *Journal of autoimmunity* 75, 39-49.

703 Lo Re, S., Lecocq, M., Uwambayinema, F., Yakoub, Y., Delos, M., Demoulin, J.B., Lucas, S.,  
704 Sparwasser, T., Renauld, J.C., Lison, D., et al. (2011). Platelet-derived growth factor-producing  
705 CD4<sup>+</sup> Foxp3<sup>+</sup> regulatory T lymphocytes promote lung fibrosis. *Am J Respir Crit Care Med* 184,  
706 1270-1281.

Mater Medical Research Institute Limited - Confidential

707 McNally, A., Hill, G.R., Sparwasser, T., Thomas, R., and Steptoe, R.J. (2011). CD4+CD25+  
708 regulatory T cells control CD8+ T-cell effector differentiation by modulating IL-2 homeostasis.  
709 Proc. Natl. Acad. Sci. U. S. A. *108*, 7529-7534.

710 Pallandre, J.R., Brillard, E., Crehange, G., Radlovic, A., Remy-Martin, J.P., Saas, P., Rohrlich,  
711 P.S., Pivot, X., Ling, X., Tiberghien, P., et al. (2007). Role of STAT3 in CD4+CD25+FOXP3+  
712 regulatory lymphocyte generation: implications in graft-versus-host disease and antitumor  
713 immunity. *J. Immunol.* *179*, 7593-7604.

714 Piedavent-Salomon, M., Willing, A., Engler, J.B., Steinbach, K., Bauer, S., Eggert, B., Ufer, F.,  
715 Kursawe, N., Wehrmann, S., Jager, J., et al. (2015). Multiple sclerosis associated genetic variants  
716 of CD226 impair regulatory T cell function. *Brain* *138*, 3263-3274.

717 Price, J.D., Beauchamp, N.M., Rahir, G., Zhao, Y., Rieger, C.C., Lau-Kilby, A.W., and Tarbell,  
718 K.V. (2014). CD8+ dendritic cell-mediated tolerance of autoreactive CD4+ T cells is deficient in  
719 NOD mice and can be corrected by blocking CD40L. *J. Leukoc. Biol.* *95*, 325-336.

720 Pullerits, R., Brisslert, M., Jonsson, I.M., and Tarkowski, A. (2006). Soluble receptor for  
721 advanced glycation end products triggers a proinflammatory cytokine cascade via beta2 integrin  
722 Mac-1. *Arthritis and rheumatism* *54*, 3898-3907.

723 Putnam, A.L., Brusko, T.M., Lee, M.R., Liu, W., Szot, G.L., Ghosh, T., Atkinson, M.A., and  
724 Bluestone, J.A. (2009). Expansion of human regulatory T-cells from patients with type 1  
725 diabetes. *Diabetes* *58*, 652-662.

726 Rosenzweig, M., Churlaud, G., Mallone, R., Six, A., Derian, N., Chajara, W., Lorenzon, R.,  
727 Long, S.A., Buckner, J.H., Afonso, G., et al. (2015). Low-dose interleukin-2 fosters a dose-  
728 dependent regulatory T cell tuned milieu in T1D patients. *J. Autoimmun.* *58*, 48-58.

Mater Medical Research Institute Limited - Confidential

729 Roychoudhuri, R., Hirahara, K., Mousavi, K., Clever, D., Klebanoff, C.A., Bonelli, M., Sciume,  
730 G., Zare, H., Vahedi, G., Dema, B., et al. (2013). BACH2 represses effector programs to stabilize  
731 T(reg)-mediated immune homeostasis. *Nature* 498, 506-510.

732 Salonen, K.M., Ryhanen, S.J., Forbes, J.M., Borg, D.J., Harkonen, T., Ilonen, J., Simell, O.,  
733 Veijola, R., Groop, P.H., and Knip, M. (2015). Decrease in circulating concentrations of soluble  
734 receptors for advanced glycation end products at the time of seroconversion to autoantibody  
735 positivity in children with prediabetes. *Diabetes Care* 38, 665-670.

736 Salonen, K.M., Ryhanen, S.J., Forbes, J.M., Harkonen, T., Ilonen, J., Laine, A.P., Groop, P.H.,  
737 Knip, M., and Finnish Pediatric Diabetes Register (2014). Circulating concentrations of soluble  
738 receptor for AGE are associated with age and AGER gene polymorphisms in children with  
739 newly diagnosed type 1 diabetes. *Diabetes Care* 37, 1975-1981.

740 Salonen, K.M., Ryhanen, S.J., Forbes, J.M., Harkonen, T., Ilonen, J., Simell, O., Veijola, R.,  
741 Groop, P.H., and Knip, M. (2016). A drop in the circulating concentrations of soluble receptor  
742 for advanced glycation end products is associated with seroconversion to autoantibody positivity  
743 but not with subsequent progression to clinical disease in children en route to type 1 diabetes.  
744 *Diabetes-Metab. Res. Rev.*

745 Sanchez-Guajardo, V., Tanchot, C., O'Malley, J.T., Kaplan, M.H., Garcia, S., and Freitas, A.A.  
746 (2007). Agonist-driven development of CD4+CD25+Foxp3+ regulatory T cells requires a second  
747 signal mediated by Stat6. *J. Immunol.* 178, 7550-7556.

748 Scheijen, J.L., and Schalkwijk, C.G. (2014). Quantification of glyoxal, methylglyoxal and 3-  
749 deoxyglucosone in blood and plasma by ultra performance liquid chromatography tandem mass  
750 spectrometry: evaluation of blood specimen. *Clinical chemistry and laboratory medicine* 52, 85-  
751 91.

Mater Medical Research Institute Limited - Confidential

752 Sherry, N., Hagopian, W., Ludvigsson, J., Jain, S.M., Wahlen, J., Ferry, R.J., Jr., Bode, B.,  
753 Aronoff, S., Holland, C., Carlin, D., et al. (2011). Teplizumab for treatment of type 1 diabetes  
754 (Protege study): 1-year results from a randomised, placebo-controlled trial. *Lancet* 378, 487-497.  
755 Sosenko, J.M., Skyler, J.S., Herold, K.C., Palmer, J.P., Type 1 Diabetes TrialNet, and Diabetes  
756 Prevention Trial-Type 1 Study Groups (2012). The metabolic progression to type 1 diabetes as  
757 indicated by serial oral glucose tolerance testing in the Diabetes Prevention Trial-type 1.  
758 *Diabetes* 61, 1331-1337.

759 Takahashi, R., Nakatsukasa, H., Shiozawa, S., and Yoshimura, A. (2017). SOCS1 Is a Key  
760 Molecule That Prevents Regulatory T Cell Plasticity under Inflammatory Conditions. *J.*  
761 *Immunol.* 199, 149-158.

762 Tao, B., Pietropaolo, M., Atkinson, M., Schatz, D., and Taylor, D. (2010). Estimating the cost of  
763 type 1 diabetes in the U.S.: a propensity score matching method. *PloS One* 5, e11501.

764 Tordesillas, L., Lozano-Ojalvo, D., Dunkin, D., Mondoulet, L., Agudo, J., Merad, M., Sampson,  
765 H.A., and Berin, M.C. (2018). PDL2(+) CD11b(+) dermal dendritic cells capture topical antigen  
766 through hair follicles to prime LAP(+) Tregs. *Nat Commun* 9, 5238.

767 Wang, S., Zhang, Y., Wang, Y., Ye, P., Li, J., Li, H., Ding, Q., and Xia, J. (2016). Amphiregulin  
768 Confers Regulatory T Cell Suppressive Function and Tumor Invasion via the EGFR/GSK-  
769 3beta/Foxp3 Axis. *J Biol Chem* 291, 21085-21095.

770 Wang, Y., Camirand, G., Lin, Y., Froicu, M., Deng, S., Shlomchik, W.D., Lakkis, F.G., and  
771 Rothstein, D.M. (2011). Regulatory T cells require mammalian target of rapamycin signaling to  
772 maintain both homeostasis and alloantigen-driven proliferation in lymphocyte-replete mice. *J.*  
773 *Immunol.* 186, 2809-2818.

Mater Medical Research Institute Limited - Confidential

774 Wang, Y., Wang, H., Piper, M.G., McMaken, S., Mo, X., Opalek, J., Schmidt, A.M., and Marsh,  
775 C.B. (2010). sRAGE induces human monocyte survival and differentiation. *J. Immunol.* *185*,  
776 1822-1835.

777 Yamaguchi, T., Hirota, K., Nagahama, K., Ohkawa, K., Takahashi, T., Nomura, T., and  
778 Sakaguchi, S. (2007). Control of immune responses by antigen-specific regulatory T cells  
779 expressing the folate receptor. *Immunity* *27*, 145-159.

780 Yamazaki, S., Dudziak, D., Heidkamp, G.F., Fiorese, C., Bonito, A.J., Inaba, K., Nussenzweig,  
781 M.C., and Steinman, R.M. (2008). CD8<sup>+</sup> CD205<sup>+</sup> splenic dendritic cells are specialized to  
782 induce Foxp3<sup>+</sup> regulatory T cells. *Journal of immunology* *181*, 6923-6933.

783 Ye, J., Qiu, J., Bostick, J.W., Ueda, A., Schjerven, H., Li, S., Jobin, C., Chen, Z.E., and Zhou, L.  
784 (2017). The Aryl Hydrocarbon Receptor Preferentially Marks and Promotes Gut Regulatory T  
785 Cells. *Cell reports* *21*, 2277-2290.

786

Mater Medical Research Institute Limited - Confidential

787 **Figures**

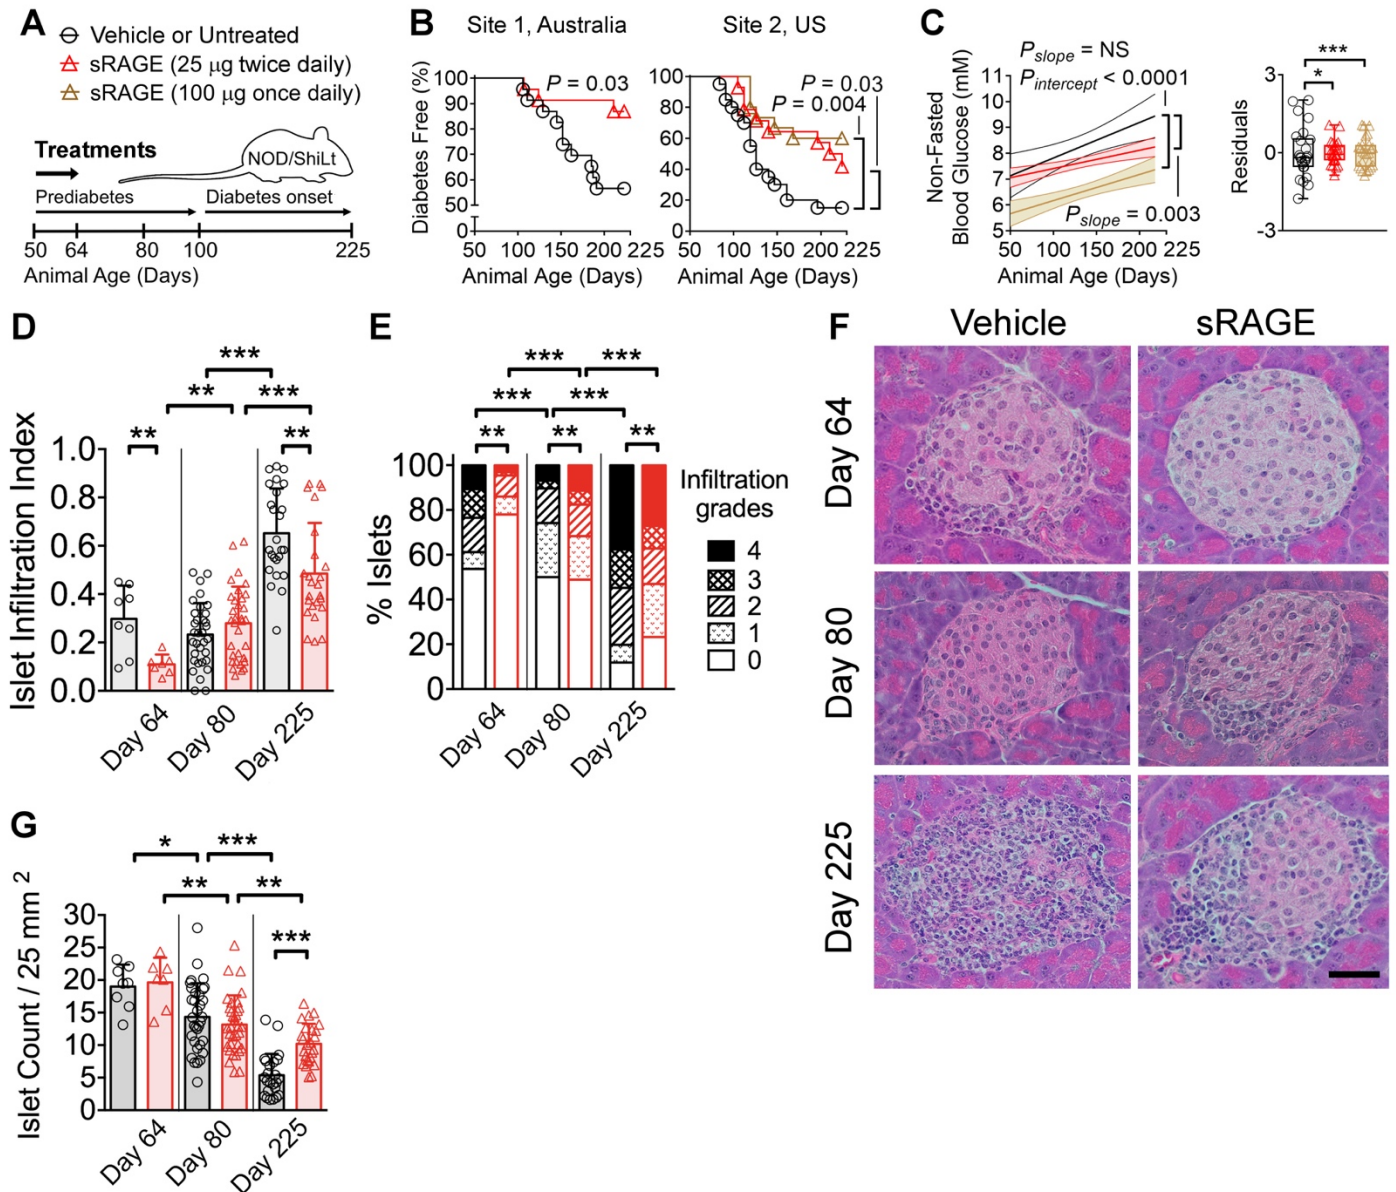

788

789 **Figure 1. Treatment with sRAGE provides lasting protection against autoimmune diabetes in an**  
 790 **international multi-site preclinical trial.**

791 (A) NOD/ShiLt mice were administered vehicle at Site 1 or untreated at Site 2 (black bars/circles), or  
 792 treated with 25 µg sRAGE twice daily (red bars/triangles) or 100 µg sRAGE once daily (brown  
 793 bars/triangles) from days 50-64 of life.

Mater Medical Research Institute Limited - Confidential

794 (B) Autoimmune diabetes incidence. Site 1 (3 independent experiments,  $n = 23$ /group). Site 2 (1  
795 independent experiment,  $n = 14-20$ /group).

796 (C) Non-fasted blood glucose concentrations shown as linear regression  $\pm$  95% confidence intervals (left)  
797 and residuals representing variability of blood glucose levels from the regression line (right).

798 (D-F) Pancreatic islet infiltration. (D) Islet infiltration index (0 indicates no infiltration; to 1 indicates  
799  $>75\%$  infiltration). (E) Degree of islet infiltration (grade 0, none; grade 1, peri-infiltration; grade 2,  $<25\%$   
800 infiltration; grade 3,  $25-75\%$  infiltration; grade 4,  $>75\%$  infiltration). (F) Representative H&E  
801 photomicrographs ( $n = 7-33$  sections/group from  $n = 4-7$  mice/group, scale bar =  $40 \mu\text{m}$ ).

802 (G) Islet count normalized by tissue area.

803 Column graphs are shown as median (IQR) and analyzed by two-tailed Mann-Whitney U-test. Box and  
804 whisker plot variances were analyzed by F-test. Degree of insulinitis is shown as mean and proportions  
805 analyzed by Fischer's exact test. Diabetes incidence are shown as Kaplan-Meier survival curves and were  
806 analyzed by log-rank test.  $*P < 0.05$ ,  $**P < 0.01$ ,  $***P < 0.001$ . sRAGE, soluble receptor for advanced  
807 glycation end products.



Mater Medical Research Institute Limited - Confidential

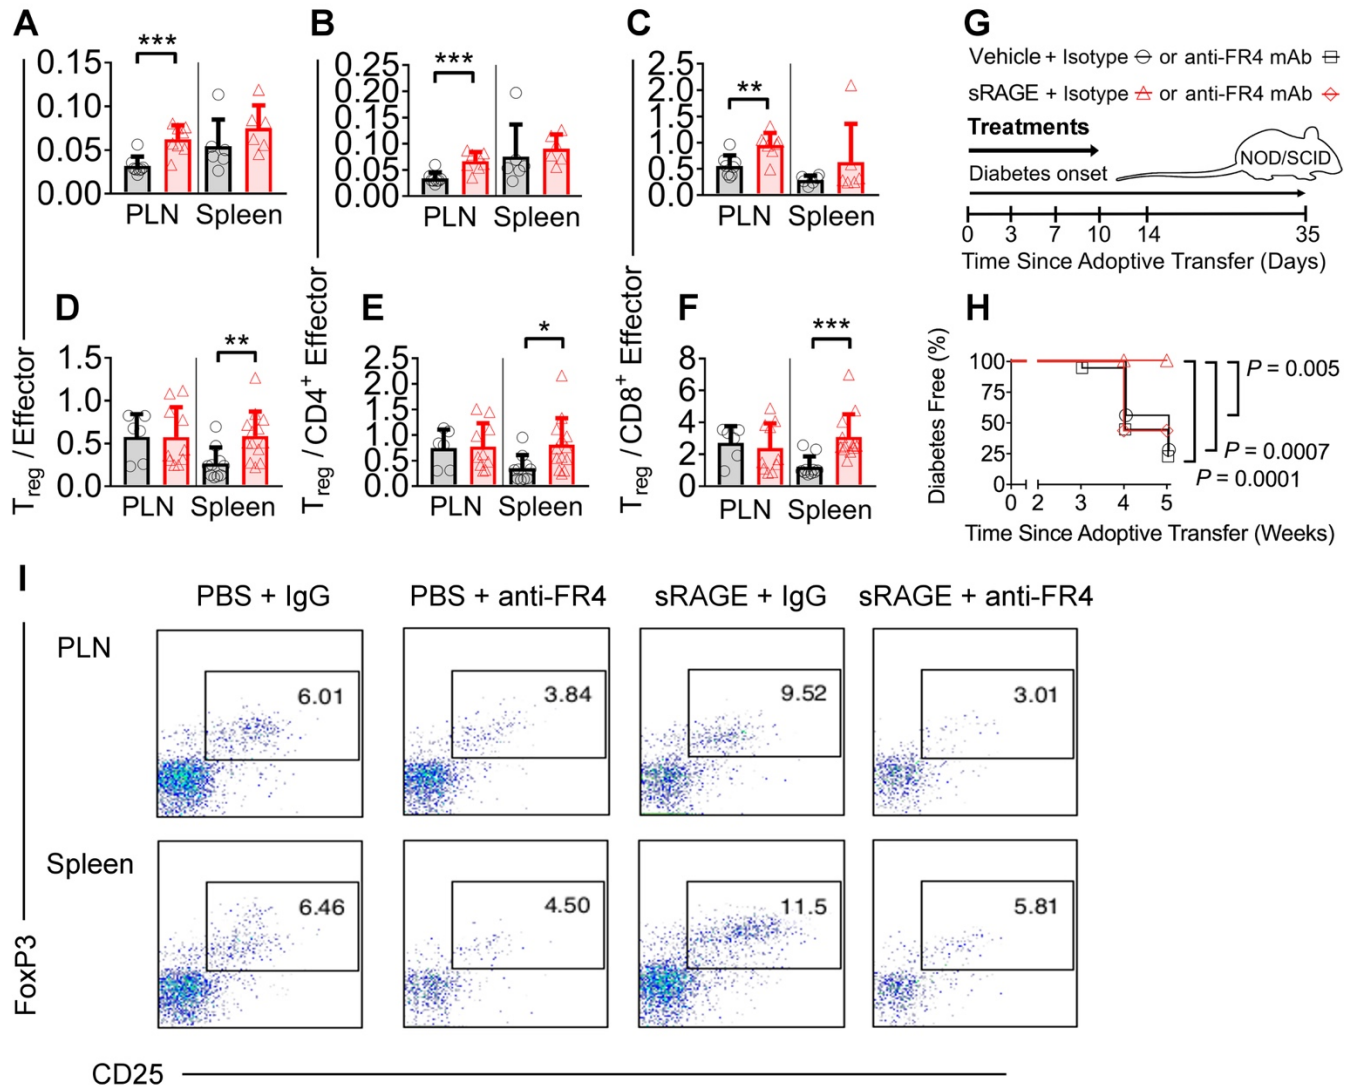

808

809 **Figure 2. Regulatory T cells ( $T_{regs}$ ) are a non-redundant mechanism of action for sRAGE treatment.**

810 (A-F) Flow cytometry quantification of  $T_{reg}/T_{eff}$  ratios on (A-C) day 64 and (D-F) day 225 in NOD/ShiLt  
811 mice ( $n = 4-13$ /group).

812 (G) In an adoptive transfer model of autoimmune diabetes, splenocytes from diabetic NOD/ShiLt donors  
813 were adoptively transferred into NOD/SCID recipients. Recipient mice were treated with vehicle or 25  $\mu$ g  
814 sRAGE twice daily for 14 days, and isotype control or anti-folate receptor 4 (FR4) antibodies at 3, 7, 10  
815 and 14 days.

816 (H) Diabetes incidence; and

Mater Medical Research Institute Limited - Confidential

817 (I) Representative dot plots of CD4<sup>+</sup>CD8<sup>-</sup>CD25<sup>+</sup>FoxP3<sup>+</sup> T<sub>reg</sub> proportions ( $n = 16$  mice/group).  
818 Column graphs are shown as median (IQR) and analyzed by two-tailed Mann-Whitney U-test. Diabetes  
819 incidence is shown as Kaplan-Meier survival curves and analyzed by log-rank test.  $*P < 0.05$ ,  $**P < 0.01$ ,  
820  $***P < 0.001$ . PLN, pancreatic lymph nodes.

Mater Medical Research Institute Limited - Confidential

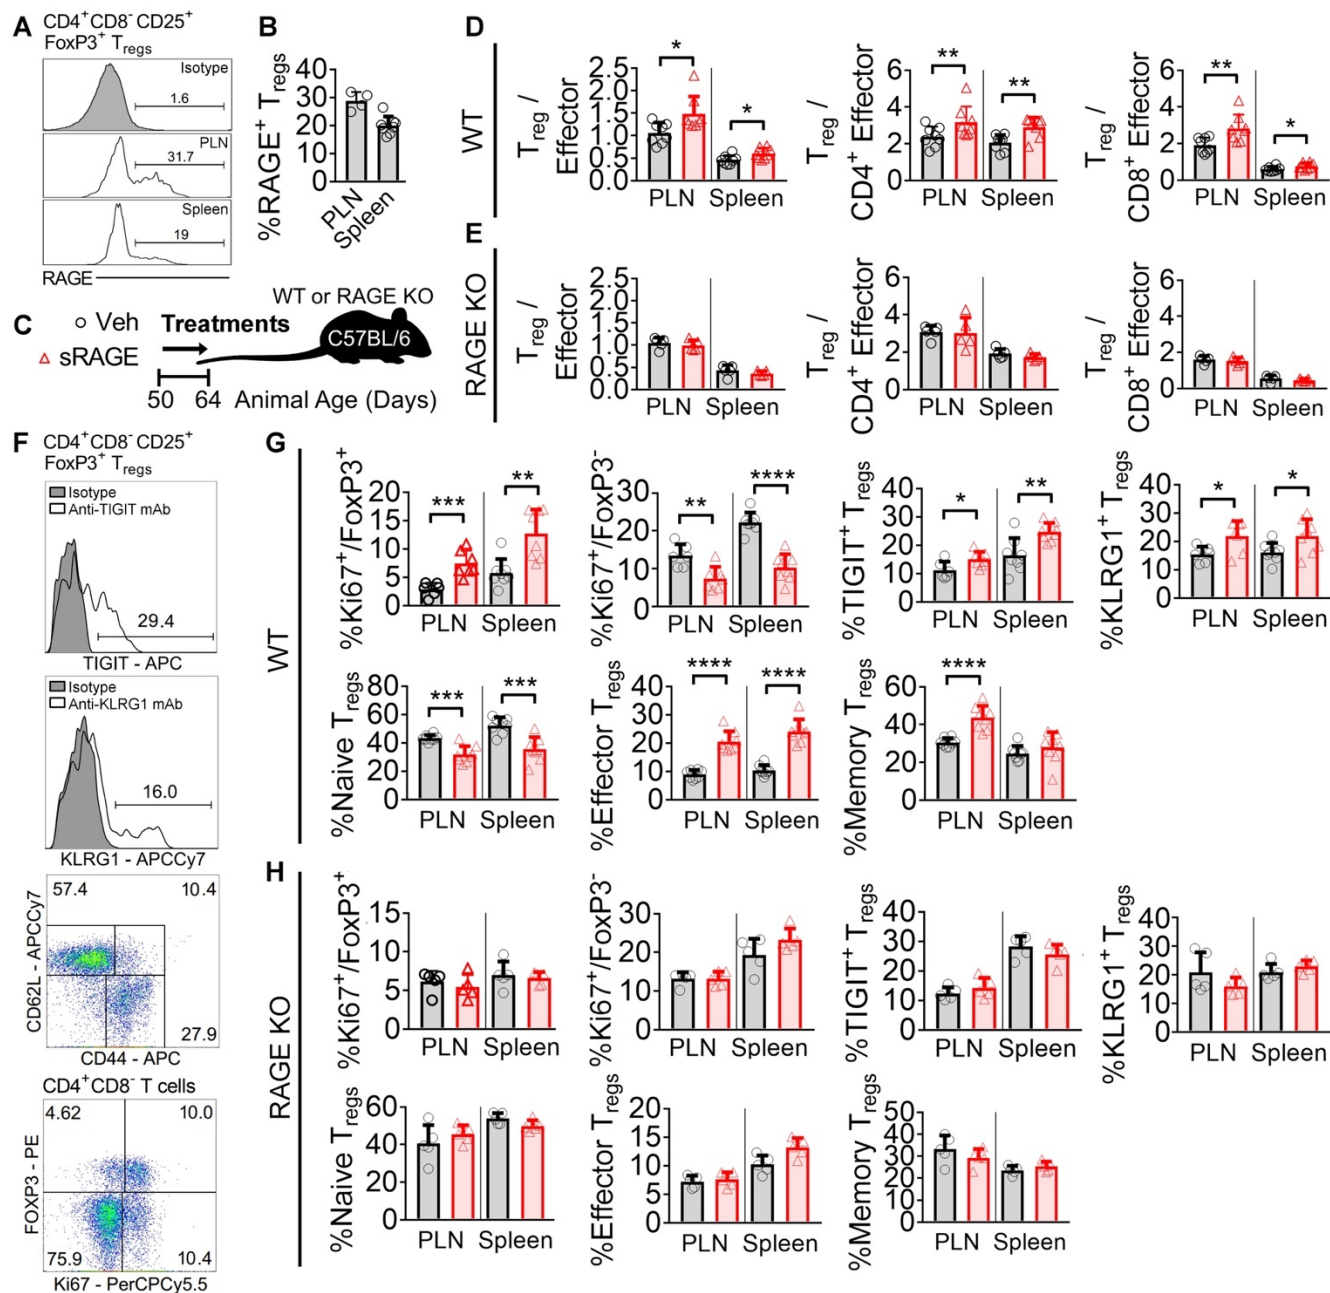

821

822 **Figure 3. RAGE is required for the modulation of T<sub>reg</sub>/T<sub>eff</sub> ratios by sRAGE treatment.**

823 (A and B) Flow cytometry quantification of RAGE expression on CD4<sup>+</sup>CD8<sup>-</sup>CD25<sup>+</sup>FoxP3<sup>+</sup> T<sub>regs</sub> in a  
 824 mouse model of autoimmune diabetes (NOD/ShiLt) on day 50 of life. (A) Representative histograms. (B)  
 825 Proportion of RAGE<sup>+</sup> T<sub>regs</sub> (*n* = 4-8 mice/tissue).

Mater Medical Research Institute Limited - Confidential

826 (C) Wild-type and RAGE KO C57BL/6 mice were treated with vehicle (black bars/circles) or 25  $\mu$ g  
827 sRAGE twice daily (red bars/triangles) on day 50-64 of life.  
828 (D and E) T<sub>reg</sub>/T<sub>eff</sub> ratios on day 64 in (D) wild-type and (E) RAGE KO mice ( $n = 8$  mice/group).  
829 (F-H) TIGIT, KLRG1, CD62L, CD44 and Ki67 expression. (F) Representative histograms and gating  
830 strategies. (G) Wild-type mice. (H) RAGE KO mice.  
831 Column graphs are shown as mean  $\pm$  SD and analyzed by two-tailed Student's t-test. \* $P < 0.05$ , \*\* $P < 0.01$ ,  
832 \*\*\* $P < 0.001$ , \*\*\*\* $P < 0.0001$ .

Mater Medical Research Institute Limited - Confidential

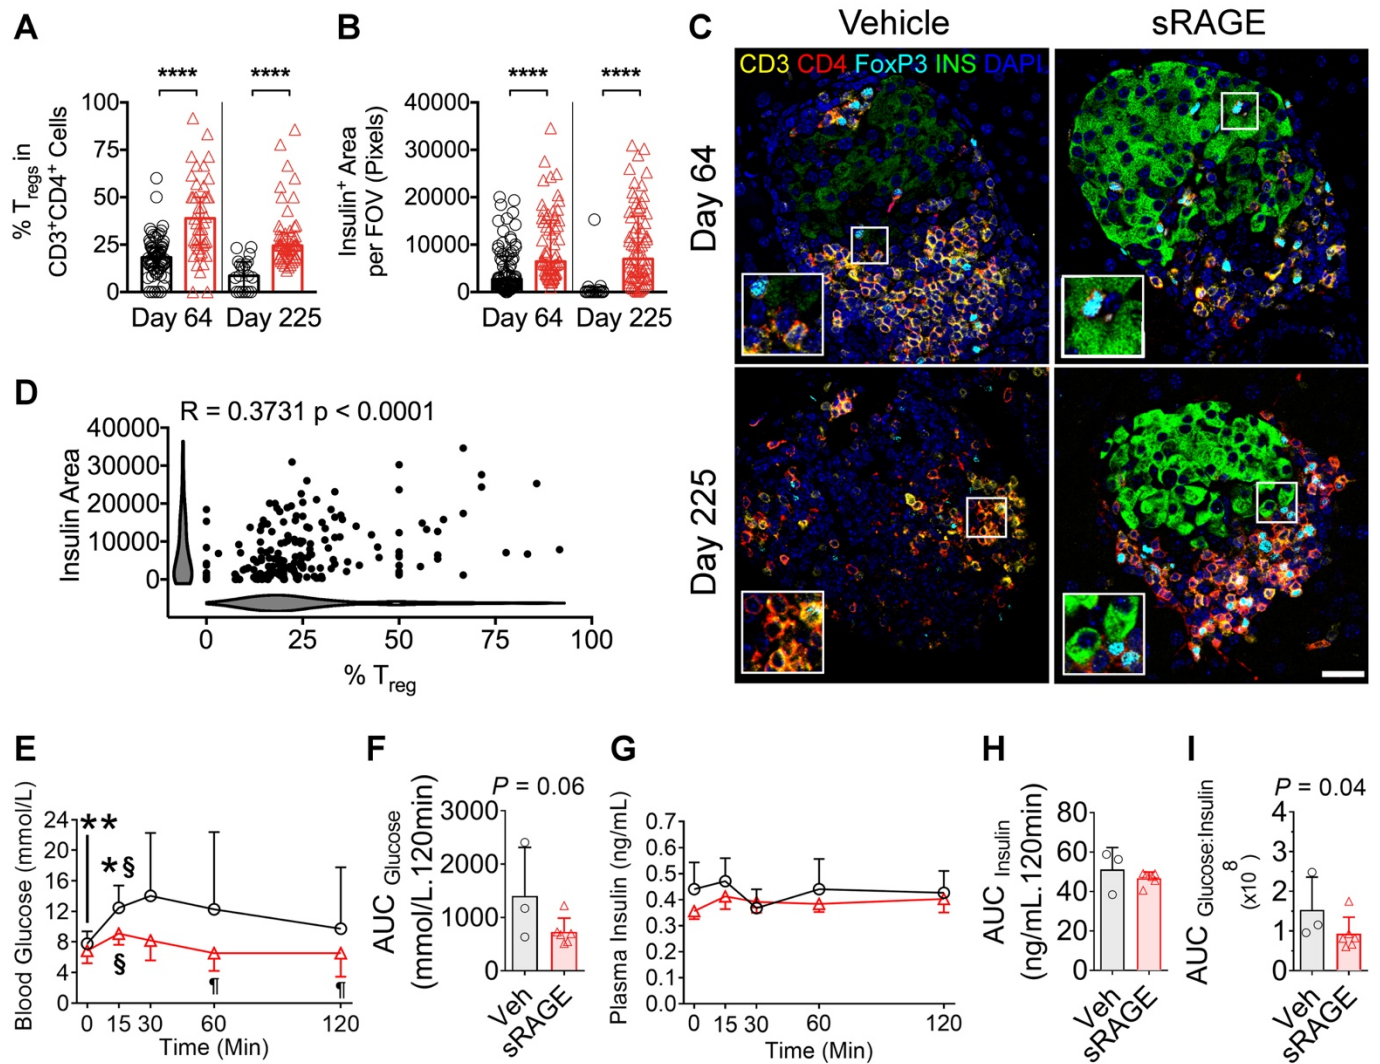

833

834 **Figure 4. Improvements in islet infiltrating  $T_{reg}$ s, insulin expression and oral glucose tolerance**  
 835 **following sRAGE treatment in NOD/ShiLt mice.**

836 (A-D) Multiplexed immunofluorescence staining and quantification of CD3, CD4, FoxP3, insulin and  
 837 DAPI ( $n = 10-20$  sections/mouse from  $n = 6$  mice/group). Inset images are 2x magnified. (A) Proportion  
 838 of islet infiltrating  $CD3^+CD4^+FoxP3^+$   $T_{reg}$ s. (B) Insulin area per field of view (FOV). (C) Representative  
 839 photomicrographs. Bar,  $40\mu m$ . (D) Correlation analyses of  $CD3^+CD4^+FoxP3^+$   $T_{reg}$  proportions and insulin  
 840 area (shaded bars are Kernel plots showing variable distribution).

Mater Medical Research Institute Limited - Confidential

841 (E-I) Oral glucose tolerance tests (OGTTs) on day 225 ( $n = 3-6/\text{group}$ ). (E) Blood glucose concentrations;  
842 (F) Area under the curve for blood glucose ( $\text{AUC}_{\text{glucose}}$ ); (G) Plasma insulin concentrations; (H)  $\text{AUC}_{\text{insulin}}$ ;  
843 (I)  $\text{AUC}_{\text{glucose:insulin}}$  ratio.  
844 Data shown as mean  $\pm$  SD and analyzed by two-tailed unpaired or paired Student t-tests. Correlation  
845 analyses were performed by Spearman's test.  $*P < 0.05$  between groups,  $**P < 0.01$  between groups,  
846  $***P < 0.0001$  between groups.  $\S P < 0.05$  vs. 0 min within the same group,  $\P P < 0.05$  vs. 15 or 30 min  
847 time points within the same group.

Mater Medical Research Institute Limited - Confidential

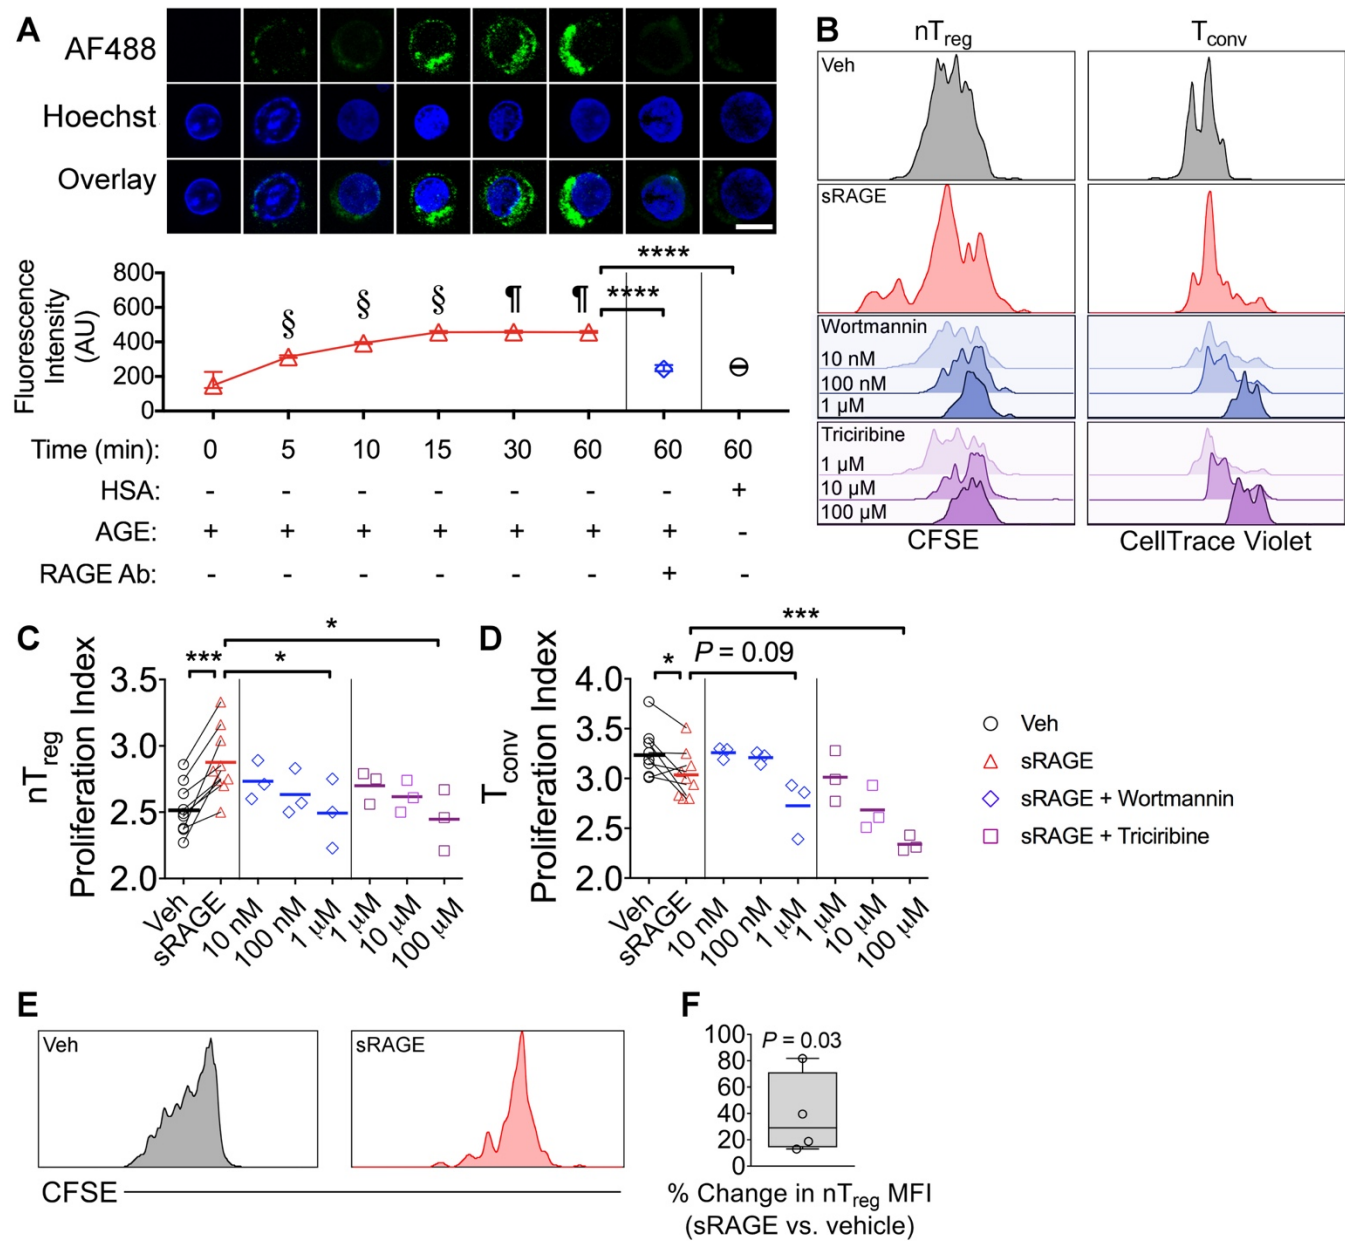

848

849 **Figure 5. Human natural T<sub>regs</sub> (nT<sub>regs</sub>) bind AGEs in a RAGE-dependent manner and proliferate**  
 850 **more in co-culture when treated with sRAGE.**

851 (A) Human CD3<sup>+</sup>CD4<sup>+</sup>CD25<sup>+</sup>CD127<sup>lo/-</sup> nT<sub>regs</sub> were incubated with AGE-modified HSA (AGE-HSA or  
 852 AGE) or unmodified HSA (HSA), both labelled with AlexaFluor488 (AF488). Anti-RAGE antibody was  
 853 added to the culture as indicated. Bar, 10μm. *n* = 3 donors/group.

Mater Medical Research Institute Limited - Confidential

854 (B-D) CFSE labeled CD3<sup>+</sup>CD4<sup>+</sup>CD25<sup>+</sup>CD127<sup>lo/-</sup> nT<sub>regs</sub> and CellTrace Violet labeled CD3<sup>+</sup>CD4<sup>+</sup>CD25<sup>-</sup>  
855 T<sub>convs</sub> were stimulated in 3 day co-culture at a 1:1 ratio containing anti-CD3/CD28 MACSiBeads (1:10,  
856 bead:cell ratio). (B) Representative histograms. (C-D) Proliferation indices of nT<sub>regs</sub> and T<sub>convs</sub> when  
857 administered vehicle or 50 µg sRAGE daily (*n* = 9/group), as well as sRAGE in addition to the PI3K-Akt-  
858 mTOR pathway inhibitors wortmannin or triciribine (*n* = 3/group).

859 (E and F) CFSE labeled CD3<sup>+</sup>CD4<sup>+</sup>CD25<sup>+</sup>CD127<sup>lo/-</sup> nT<sub>regs</sub> were stimulated in 3 day monoculture  
860 containing anti-CD3/CD28 MACSiBeads (1:20, bead:cell) and 200 IU/mL IL-2. (E) Representative  
861 histograms. (F) Percent change in CFSE mean fluorescence intensity (MFI; *n* = 4/group).

862 Data shown as mean ± SD; paired two-tailed Student's t-tests. § *P* < 0.05 vs. all previous time points. ¶ *P* <  
863 0.05 vs. 0, 5, 10 and 15 min. \**P* < 0.05, \*\*\**P* < 0.001. \*\*\*\**P* < 0.0001.



Mater Medical Research Institute Limited - Confidential

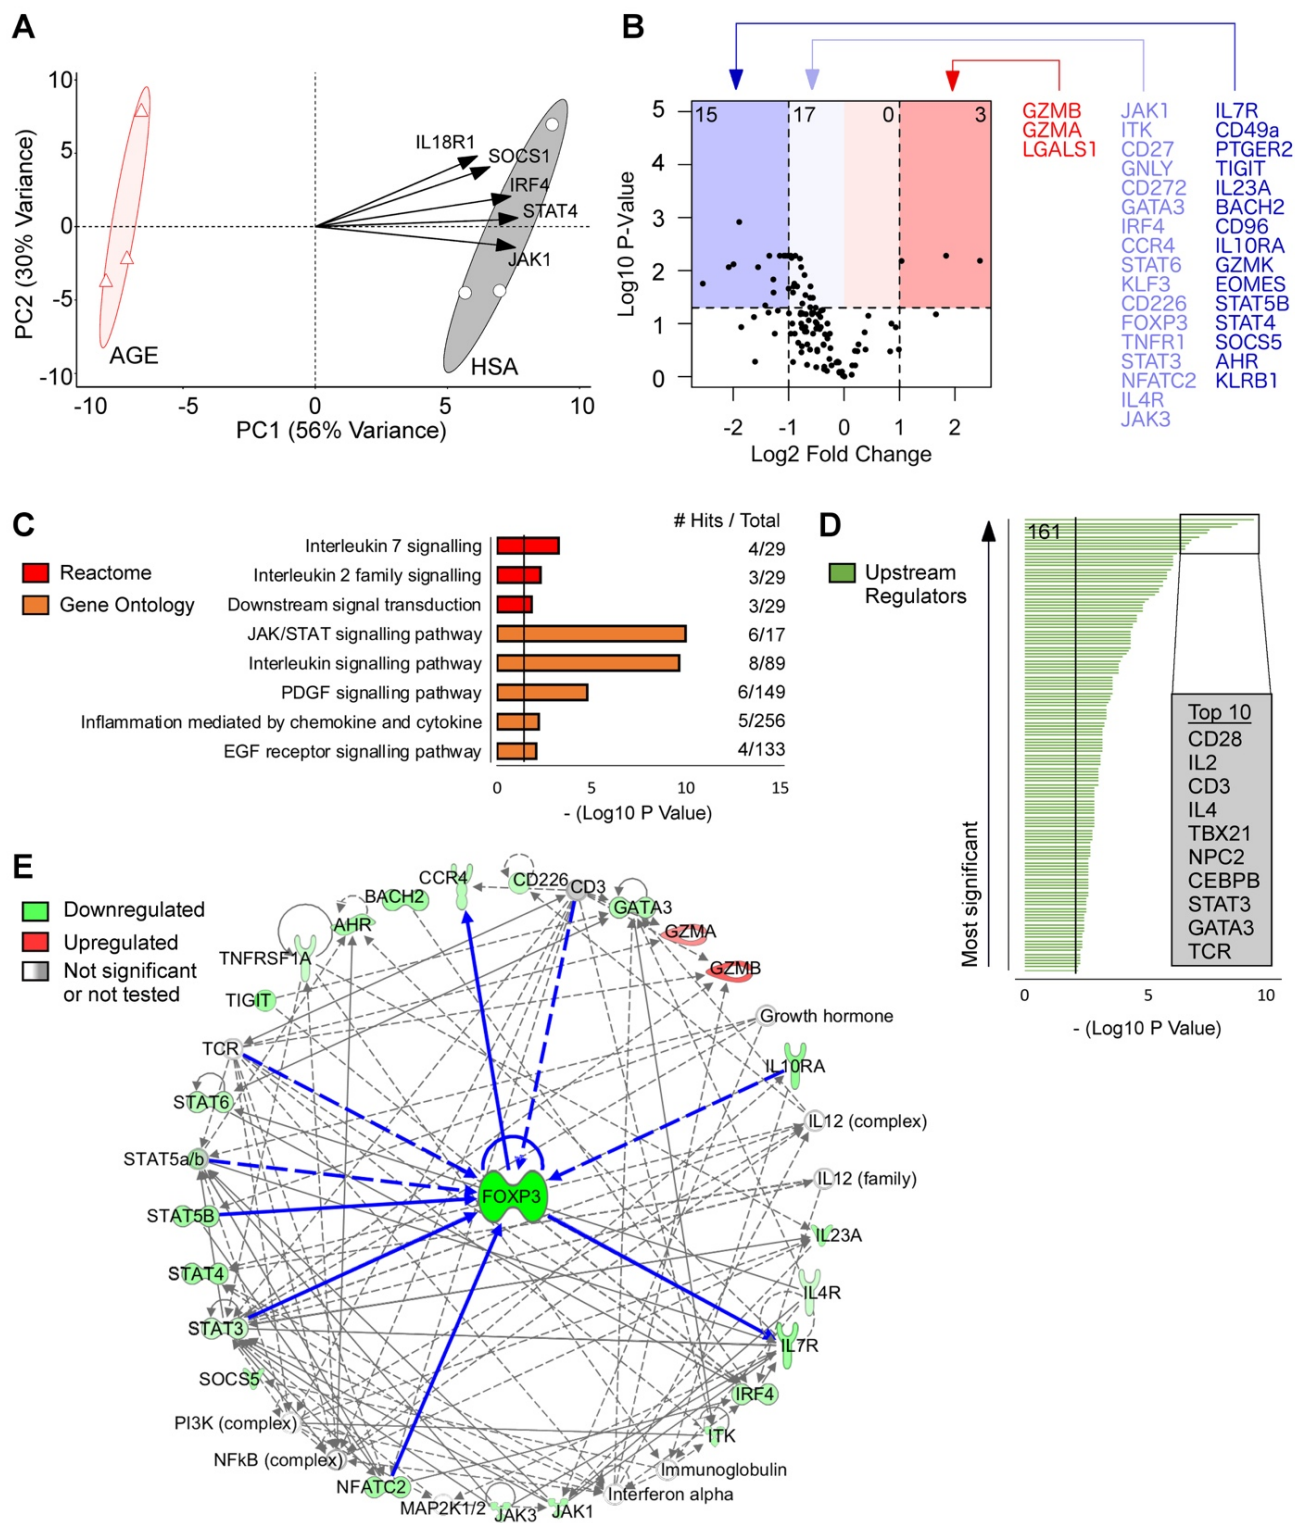

864

865 **Figure 6. AGE treatment of human nT<sub>regs</sub> downregulates key genes for suppressive function and**  
 866 **manipulates signaling cascades upstream and downstream of FOXP3.**

Mater Medical Research Institute Limited - Confidential

- 867 (A) Principal component analysis (PCA) with the top five variable loadings shown as arrows.
- 868 (B) Volcano plot visualization for changes in gene expression (number of differentially expressed genes  
869 shown in top corners).
- 870 (C) Pathway enrichment analysis using the Reactome and Gene Ontology databases.
- 871 (D) Upstream regulator predictions using Ingenuity Pathway Analysis (161 significant regulators were  
872 identified).
- 873 (E) Network analysis using *FOXP3* as the focus node. Neighboring molecules are connected to *FOXP3*  
874 with bolded blue lines. All other molecules are 2-3 nodes adjacent to *FOXP3*. Direct relationships are  
875 shown as solid lines, indirect relationships are shown as dashed lines.
- 876  $n = 3/\text{group}$ ,  $P$  values were corrected by false discovery rate or Bonferroni adjustment.

Mater Medical Research Institute Limited - Confidential

877 **Tables**

878 **Table 1. Plasma concentrations of RAGE ligands in NOD/ShiLt mice.**

879 Data shown as median (IQR); two-tailed Mann-Whitney U-test;  $n = 12-15/\text{group}$ .  $*P < 0.05$  vs.  
880 vehicle at same time point. Lys, lysine.

| Age                   | Day 64         |                | Day 225        |                |
|-----------------------|----------------|----------------|----------------|----------------|
|                       | Vehicle        | sRAGE          | Vehicle        | sRAGE          |
| CML (nmol/mmol Lys)   | 32.2 (3.5)     | 31.1 (3.7)     | 76.5 (10.6)    | 71.1 (12.4)*   |
| CEL (nmol/mmol Lys)   | 13.5 (4.0)     | 16.2 (8.0)     | 15.4 (3.8)     | 12.3 (4.2)*    |
| MG-H1 (nmol/mmol Lys) | 229.3 (45.1)   | 260.1 (56.4)   | 267.7 (39.5)   | 247.0 (54.6)*  |
| MGO (nmol/L)          | 499.5 (78.8)   | 436.4 (142.9)  | 643.7 (280.2)  | 556.1 (246.4)  |
| GO (nmol/L)           | 848.4 (301.8)  | 958.3 (316.0)  | 1083.0 (505.2) | 1004.0 (518.5) |
| 3-DG (nmol/L)         | 987.3 (254.7)  | 1163.0 (401.0) | 2547.0 (476.0) | 2227.0 (483.0) |
| S100A8 (ng/mL)        | 0.5 (0.1)      | 7.1 (23.0)     | 5.3 (13.1)     | 5.0 (26.0)     |
| S100A9 (ng/mL)        | 166.8 (131.8)  | 301.3 (303.0)  | 74.9 (144.3)   | 100.5 (81.8)   |
| S100B (ng/mL)         | 1081.0 (812.9) | 882.5 (512.7)  | 1052.0 (528.8) | 1077.0 (545.6) |
| HMGB1 (ng/mL)         | 11.9 (7.5)     | 15.8 (8.2)     | 7.1 (3.7)      | 5.7 (5.0)      |

881

Mater Medical Research Institute Limited - Confidential

882 **Supplemental Figures Titles and Legends**

883 **Figure S1. Flow cytometry gating strategy for mouse T cells.**

884 (A) Debris were excluded and single cells gated.

885 (B) Conventional T cells ( $T_{\text{convs}}$ ): FoxP3<sup>+</sup>  $T_{\text{regs}}$  were excluded, then CD4<sup>+</sup>CD8<sup>-</sup> and CD8<sup>+</sup>CD4<sup>-</sup> T  
886 cells were gated. Naïve, effector ( $T_{\text{eff}}$ ) and memory cells were defined as CD62L<sup>+</sup>CD44<sup>-</sup>,  
887 CD62L<sup>-</sup>CD44<sup>+</sup> and CD62L<sup>+</sup>CD44<sup>+</sup>, respectively.

888 (C)  $T_{\text{regs}}$ : CD4<sup>+</sup>CD8<sup>-</sup> T cells were gated, then CD4<sup>+</sup>CD8<sup>-</sup>CD25<sup>+</sup>Foxp3<sup>+</sup>  $T_{\text{regs}}$  were gated.

889 **Figure S2. sRAGE increases the numbers of CD4<sup>+</sup>CD8<sup>-</sup>CD25<sup>+</sup>Foxp3<sup>+</sup>  $T_{\text{regs}}$  and  $T_{\text{convs}}$  in the**  
890 **pancreatic lymph nodes (PLN) and spleen on day 64.**

891 (A) CD4<sup>+</sup>CD8<sup>-</sup>CD25<sup>+</sup>Foxp3<sup>+</sup>  $T_{\text{regs}}$ .

892 (B) CD4<sup>+</sup>FoxP3<sup>-</sup>  $T_{\text{convs}}$ ; and

893 (C) CD8<sup>+</sup>FoxP3<sup>-</sup>  $T_{\text{convs}}$ , accompanied with their CD62L<sup>+</sup>CD44<sup>-</sup> naïve, CD62L<sup>-</sup>CD44<sup>+</sup> effector  
894 ( $T_{\text{eff}}$ ) and CD62L<sup>+</sup>CD44<sup>+</sup> memory subsets.

895 Two-tailed Mann-Whitney U-test.  $n = 4-13/\text{group}$ . \*  $P < 0.05$ ; \*\*  $P < 0.01$ .

896 **Figure S3. sRAGE decreases the numbers of CD4<sup>+</sup>CD8<sup>-</sup>CD25<sup>+</sup>Foxp3<sup>+</sup>  $T_{\text{regs}}$  and  $T_{\text{convs}}$  in the**  
897 **PLN and spleen on day 225.**

898 (A) CD4<sup>+</sup>CD8<sup>-</sup>CD25<sup>+</sup>Foxp3<sup>+</sup>  $T_{\text{regs}}$ .

899 (B) CD4<sup>+</sup>FoxP3<sup>-</sup>  $T_{\text{convs}}$ ; and

900 (C) CD8<sup>+</sup>FoxP3<sup>-</sup>  $T_{\text{convs}}$ , accompanied with their CD62L<sup>+</sup>CD44<sup>-</sup> naïve, CD62L<sup>-</sup>CD44<sup>+</sup> effector  
901 ( $T_{\text{eff}}$ ) and CD62L<sup>+</sup>CD44<sup>+</sup> memory subsets.

902 Two-tailed Mann-Whitney U-test.  $n = 4-13/\text{group}$ . \*  $P < 0.05$ ; \*\*\*  $P < 0.001$ .

Mater Medical Research Institute Limited - Confidential

903 **Figure S4. sRAGE increases the numbers of dendritic cells and macrophages on day 64.**

904 (A) Conventional dendritic cells (cDCs) including CD8<sup>+</sup> cDCs (CD11c<sup>+</sup>CD11b<sup>-</sup>B220<sup>-</sup>CD8<sup>+</sup>) and  
905 CD11b<sup>+</sup> cDCs (CD11c<sup>+</sup>CD11b<sup>+</sup>B220<sup>-</sup>CD8<sup>-</sup>), as well as plasmacytoid dendritic cells (pDCs;  
906 CD11c<sup>+</sup>CD11b<sup>-</sup>B220<sup>+</sup>).

907 (B) Macrophages (F4/80<sup>+</sup>CD11c<sup>-</sup>CD11b<sup>+</sup>B220<sup>int/hi</sup>).

908 **Figure S5. Prediabetes oral glucose tolerance tests (OGTTs).**

909 (A-E) OGTTs on day 64 (*n* = 8/group).

910 (F-J) OGTTs on day 80 (*n* = 15/group).

911 (A, F) Blood glucose concentrations; (B, G) Area under the curve for blood glucose (AUC<sub>glucose</sub>);

912 (C, H) Plasma insulin concentrations; (D, I) AUC<sub>insulin</sub>; (E, J) AUC<sub>glucose:insulin</sub> ratio.

913 Data shown as mean ± SD and analyzed by two-tailed unpaired Student t-tests. \* *P* < 0.05

914 between groups.

915 **Figure S6. Gating strategies for human T cell proliferation experiments.**

916 (A and B) CD3<sup>+</sup>CD4<sup>+</sup>CD25<sup>+</sup>CD127<sup>lo/-</sup> natural T<sub>regs</sub> (nT<sub>regs</sub>) and CD3<sup>+</sup>CD4<sup>+</sup> CD25<sup>-</sup> T<sub>conv</sub>s were  
917 positively isolated by FACS.

918 (C and D) CD3<sup>+</sup>CD4<sup>+</sup>CD25<sup>+</sup>CD127<sup>lo/-</sup> nT<sub>regs</sub> were assessed for FoxP3 expression.

919 (E-G) Gating strategy for analyzing nT<sub>reg</sub> and T<sub>conv</sub> proliferation when co-cultured. (E) Debris,

920 multiplets and dead cells were excluded, (F) CD3<sup>+</sup>CD4<sup>+</sup> cells were gated. CD3<sup>+</sup>CD4<sup>+</sup> cells were

921 then analyzed for nT<sub>reg</sub> and T<sub>conv</sub> proliferation by CFSE and CellTrace Violet dilution,

922 respectively. (G) nT<sub>regs</sub> and T<sub>conv</sub>s were both CD25<sup>+</sup>CD127<sup>lo/-</sup> post-stimulation, so CD25 and

923 CD127 expression was not used to delineate T<sub>regs</sub> and T<sub>conv</sub>s prior to CFSE and CellTrace Violet

924 dye dilution analysis.

Mater Medical Research Institute Limited - Confidential

925 (H-J) Gating strategy for analyzing nT<sub>reg</sub> proliferation when cultured alone. (H) Debris,  
926 multiplets and dead cells were excluded, (I) CD3<sup>+</sup>CD4<sup>+</sup> cells were gated, (J) CD127<sup>lo/-</sup> cells were  
927 gated as nT<sub>regs</sub>. nT<sub>regs</sub> were then analyzed for proliferation by CFSE dilution.

928 **Figure S7. Gating strategies for human induced T<sub>reg</sub> (iT<sub>reg</sub>) differentiation experiment.**

929 (A and B) Purity check for naive CD4<sup>+</sup> T cells (CD3<sup>+</sup>CD4<sup>+</sup>CD45RA<sup>+</sup>CD45RO<sup>-</sup>) (A) before  
930 negative isolation (peripheral blood mononuclear cells, PBMCs) and (B) after negative isolation.  
931 (C-E) Gating strategy for analyzing iT<sub>reg</sub> differentiation. (C) Debris, multiplets and dead cells  
932 were excluded, (D) CD3<sup>+</sup>CD4<sup>+</sup> cells were gated, (E) CD25<sup>+</sup>CD127<sup>lo/-</sup> cells were gated as iT<sub>regs</sub>.

933 **Figure S8. Human iT<sub>reg</sub> differentiation in AGE-containing culture media is modestly**  
934 **decreased by sRAGE treatment.**

935 Human naive CD3<sup>+</sup>CD4<sup>+</sup>CD45RA<sup>+</sup>CD45RO<sup>-</sup> T cells were incubated in 3 day co-culture  
936 containing 5 ng/mL IL-2, 2 ng/mL TGF-β and 1 μg/mL plate-bound anti-CD3 antibody.

937 (A) Representative dot plots of CD3<sup>+</sup>CD4<sup>+</sup>CD25<sup>+</sup>CD127<sup>lo/-</sup> iT<sub>regs</sub> in AGE-supplemented media  
938 with co-administration of vehicle or sRAGE (50 μg/day).

939 (B) Quantification of change in iT<sub>reg</sub> differentiation by sRAGE treatment. Data shown as mean ±  
940 SD; paired t-tests; n = 4/group.

941 **Table S1. Human nT<sub>reg</sub> NanoString predicted upstream regulators.**

942 **Table S2. Human nT<sub>reg</sub> NanoString network analysis.**

943 **Table S3. Human nT<sub>reg</sub> NanoString volcano plot values.**
