# Supplementary material for: Expansion of Functional Regulatory T Cells Using Soluble RAGE Prevents Type 1 Diabetes
Source: bioRxiv or medRxiv preprint supplement (doi:10.1101/2020.01.10.902627), 2020-01-11
Supplement: Supplementary file [file media-1.pdf]

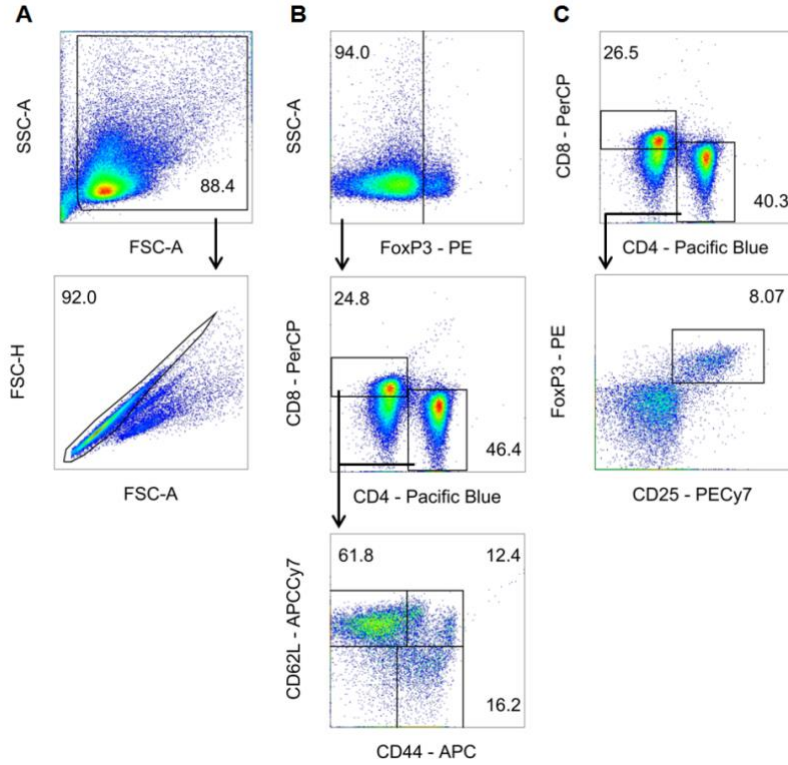

**Figure S1. Flow cytometry gating strategy for mouse T cells.**

(A) Debris were excluded and single cells gated.

(B) Conventional T cells ( $T_{convs}$ ): FoxP3<sup>+</sup>  $T_{regs}$  were excluded, then CD4<sup>+</sup>CD8<sup>-</sup> and CD8<sup>+</sup>CD4<sup>-</sup> T cells were gated. Naïve, effector ( $T_{eff}$ ) and memory cells were defined as CD62L<sup>+</sup>CD44<sup>-</sup>, CD62L<sup>-</sup>CD44<sup>+</sup> and CD62L<sup>+</sup>CD44<sup>+</sup>, respectively.

(C)  $T_{regs}$ : CD4<sup>+</sup>CD8<sup>-</sup> T cells were gated, then CD4<sup>+</sup>CD8<sup>-</sup>CD25<sup>+</sup>Foxp3<sup>+</sup>  $T_{regs}$  were gated.

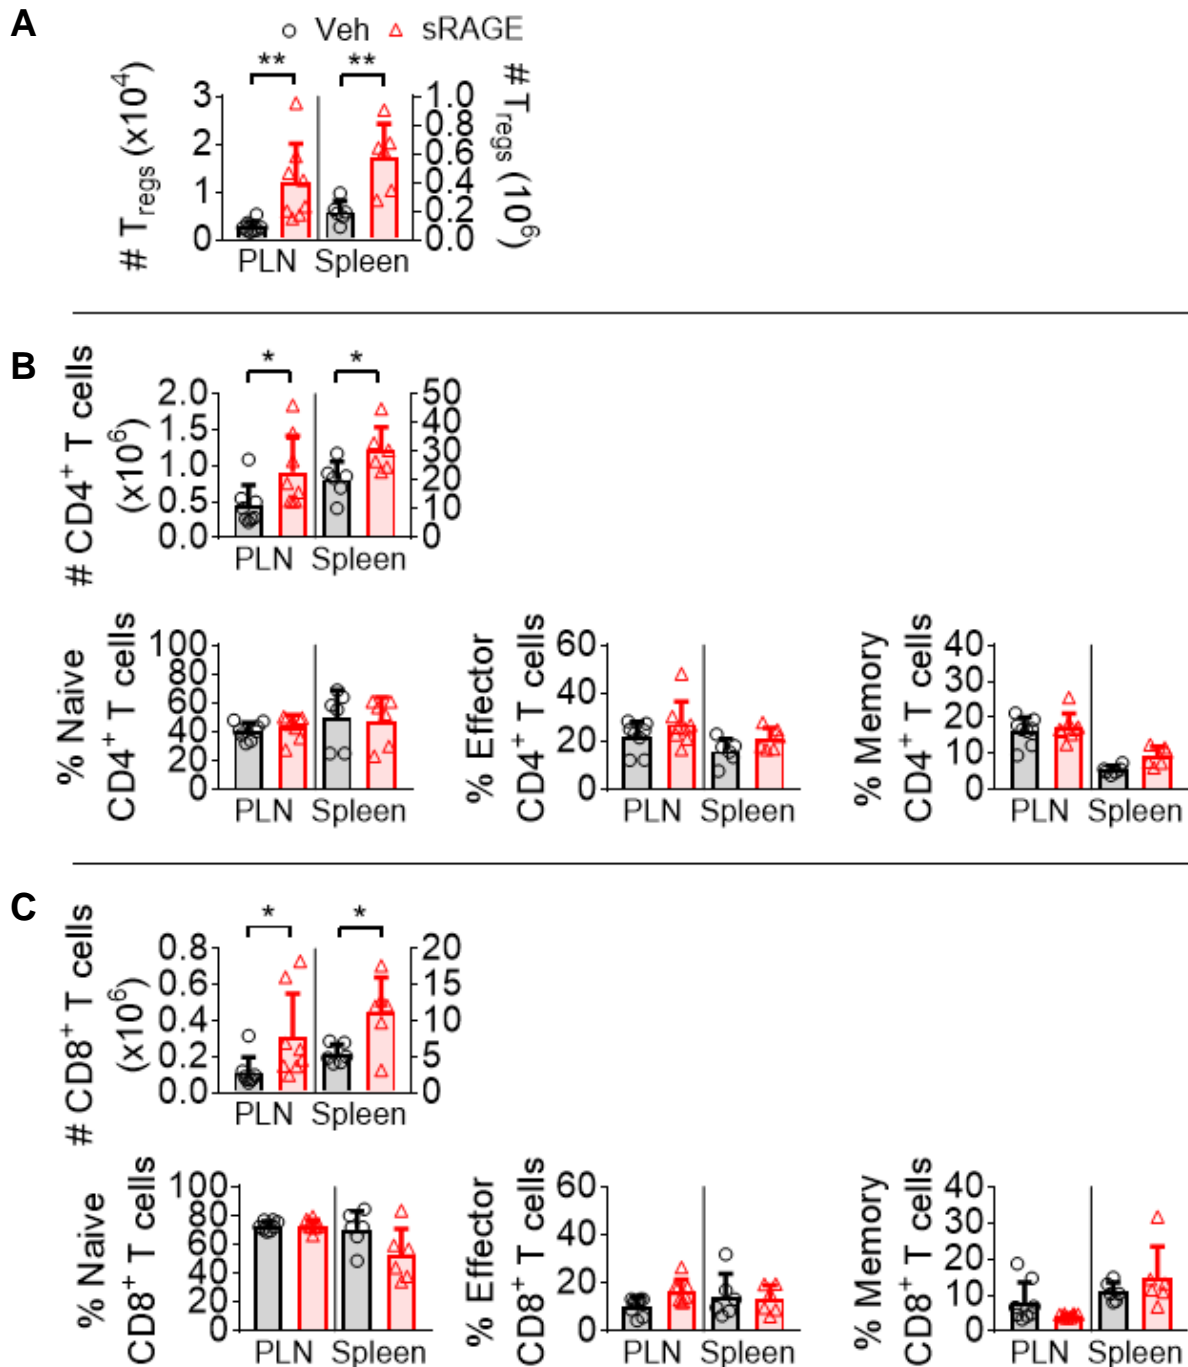

**Figure S2. sRAGE increases the numbers of CD4<sup>+</sup>CD8<sup>-</sup>CD25<sup>+</sup>Foxp3<sup>+</sup> T<sub>regs</sub> and T<sub>convs</sub> in the pancreatic lymph nodes (PLN) and spleen on day 64.**

(A) CD4<sup>+</sup>CD8<sup>-</sup>CD25<sup>+</sup>Foxp3<sup>+</sup> T<sub>regs</sub>.

(B) CD4<sup>+</sup>FoxP3<sup>-</sup> T<sub>convs</sub>; and

(C) CD8<sup>+</sup>FoxP3<sup>-</sup> T<sub>convs</sub>, accompanied with their CD62L<sup>+</sup>CD44<sup>-</sup> naïve, CD62L<sup>-</sup>CD44<sup>+</sup> effector (T<sub>eff</sub>) and CD62L<sup>+</sup>CD44<sup>+</sup> memory subsets.

Two-tailed Mann-Whitney U-test. *n* = 4-13/group. \* *P* < 0.05; \*\* *P* < 0.01.

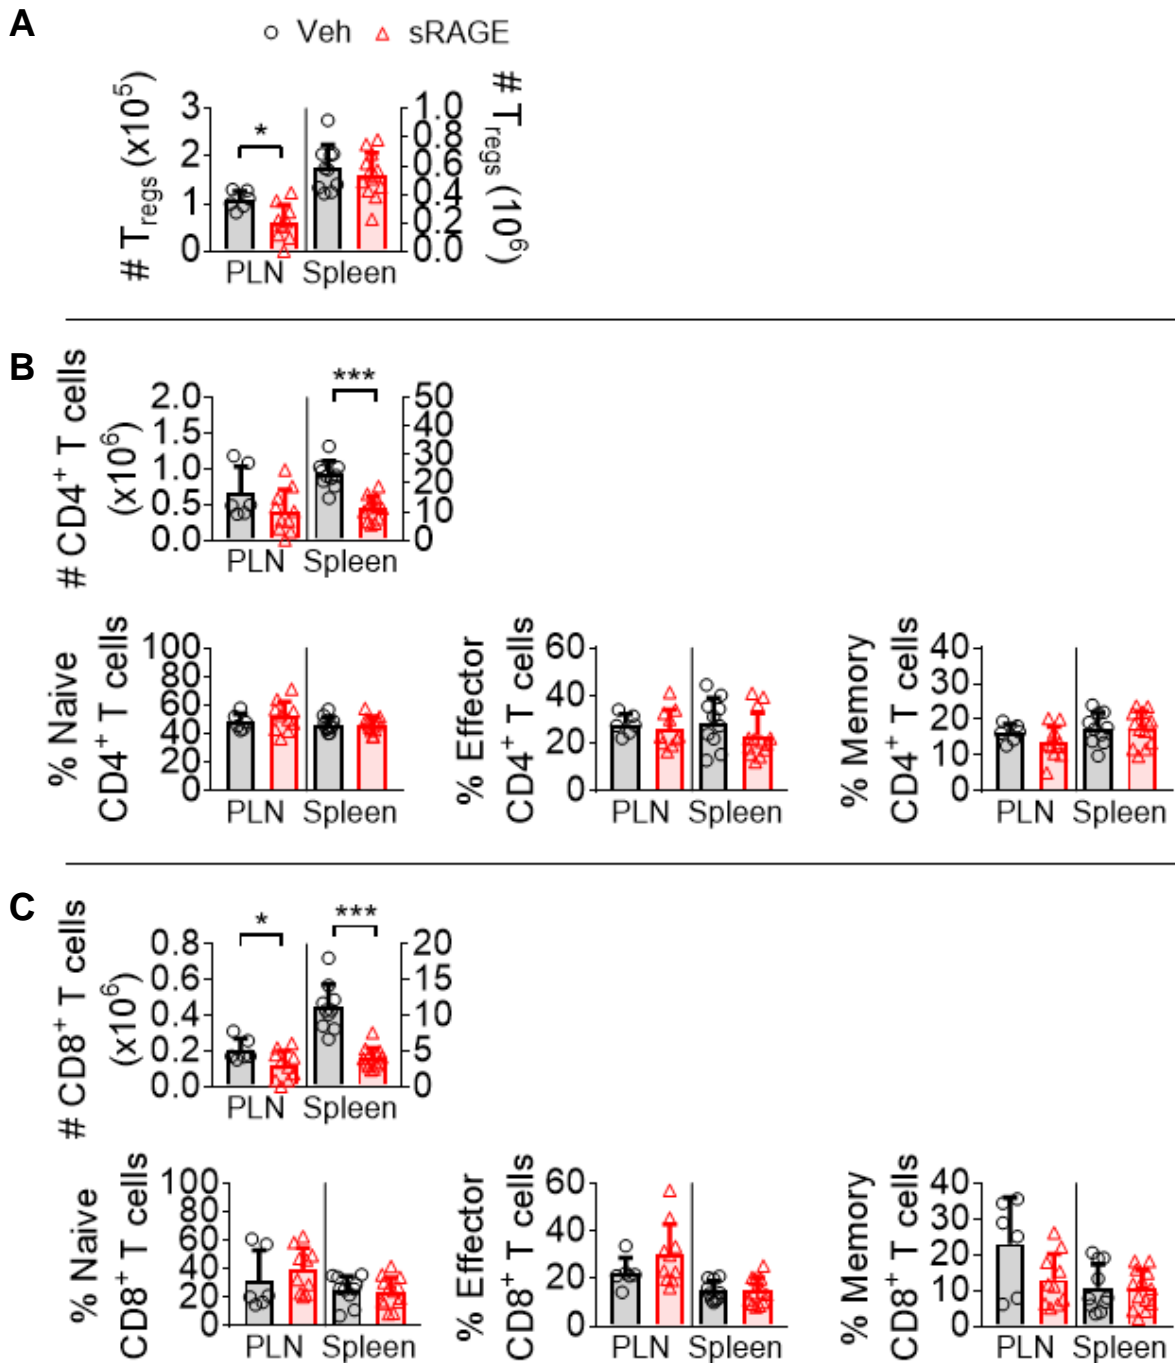

**Figure S3. sRAGE decreases the numbers of CD4<sup>+</sup>CD8<sup>-</sup>CD25<sup>+</sup>Foxp3<sup>+</sup> T<sub>regs</sub> and T<sub>convS</sub> in the PLN and spleen on day 225.**

(A) CD4<sup>+</sup>CD8<sup>-</sup>CD25<sup>+</sup>Foxp3<sup>+</sup> T<sub>regs</sub>.

(B) CD4<sup>+</sup>FoxP3<sup>-</sup> T<sub>convS</sub>; and

(C) CD8<sup>+</sup>FoxP3<sup>-</sup> T<sub>convS</sub>, accompanied with their CD62L<sup>+</sup>CD44<sup>-</sup> naïve, CD62L<sup>-</sup>CD44<sup>+</sup> effector (T<sub>eff</sub>) and CD62L<sup>+</sup> CD44<sup>+</sup> memory subsets.

Two-tailed Mann-Whitney U-test. *n* = 4-13/group. \* *P* < 0.05; \*\*\* *P* < 0.001.

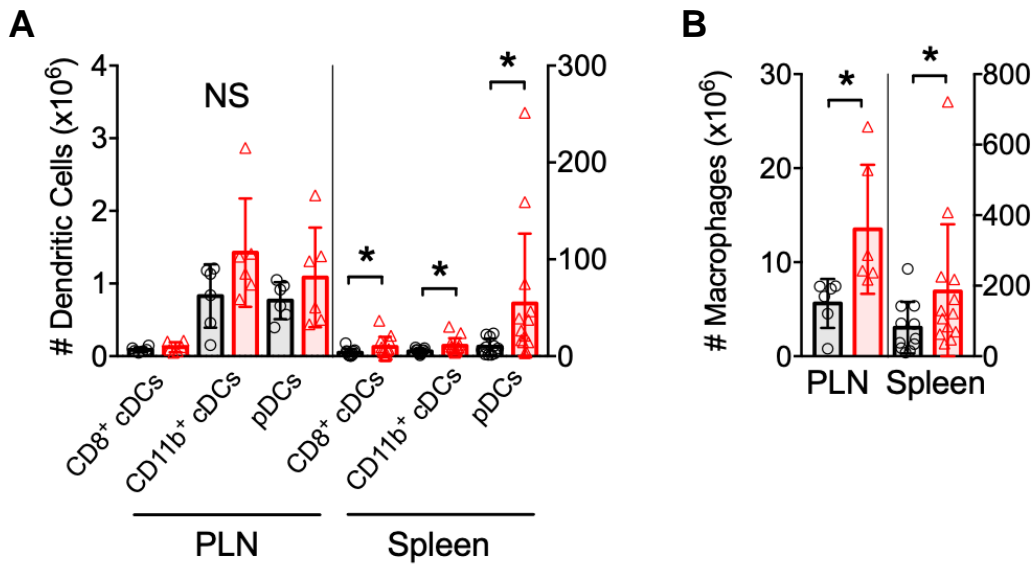

**Figure S4. sRAGE increases the numbers of dendritic cells and macrophages on day 64.**

(A) Conventional dendritic cells (cDCs) including CD8<sup>+</sup> cDCs (CD11c<sup>+</sup>CD11b<sup>-</sup>B220<sup>-</sup>CD8<sup>+</sup>) and CD11b<sup>+</sup> cDCs (CD11c<sup>+</sup>CD11b<sup>+</sup>B220<sup>-</sup>CD8<sup>-</sup>), as well as plasmacytoid dendritic cells (pDCs; CD11c<sup>+</sup>CD11b<sup>-</sup>B220<sup>+</sup>).

(B) Macrophages (F4/80<sup>+</sup>CD11c<sup>-</sup>CD11b<sup>+</sup>B220<sup>int/hi</sup>).

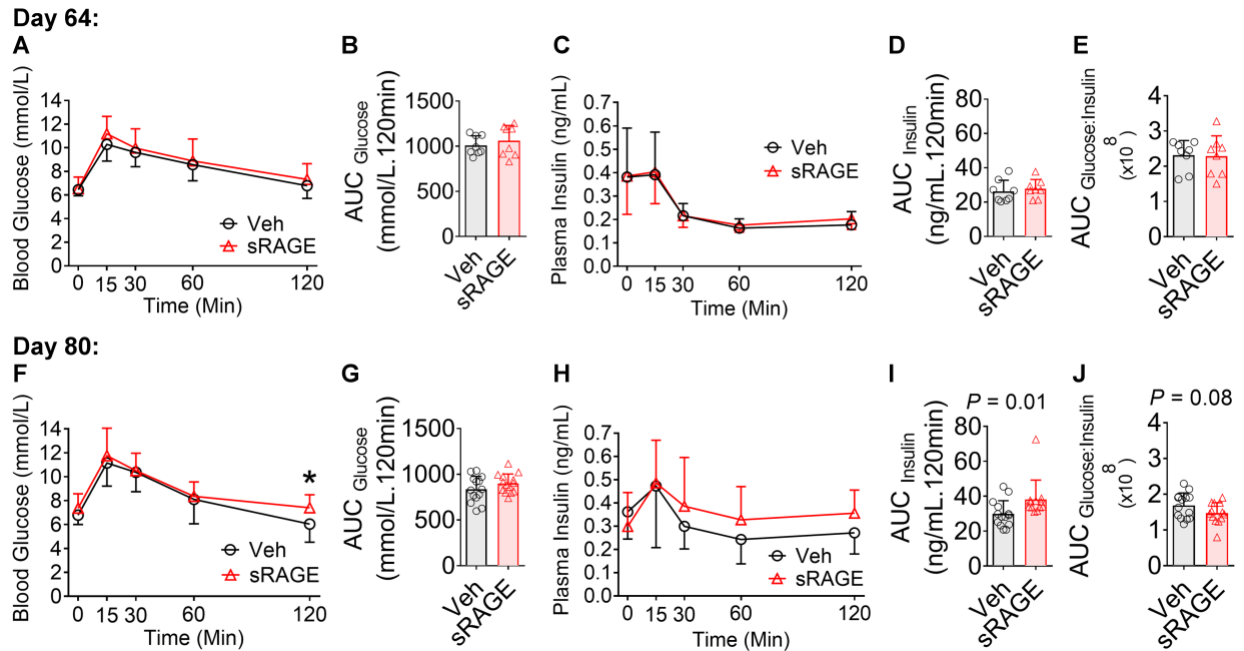

**Figure S5. Prediabetes oral glucose tolerance tests (OGTTs).**

(A-E) OGTTs on day 64 ( $n = 8$ /group).

(F-J) OGTTs on day 80 ( $n = 15$ /group).

(A, F) Blood glucose concentrations; (B, G) Area under the curve for blood glucose ( $AUC_{\text{glucose}}$ );

(C, H) Plasma insulin concentrations; (D, I)  $AUC_{\text{insulin}}$ ; (E, J)  $AUC_{\text{glucose:insulin}}$  ratio.

Data shown as mean  $\pm$  SD and analyzed by two-tailed unpaired Student t-tests. \*  $P < 0.05$  between groups.

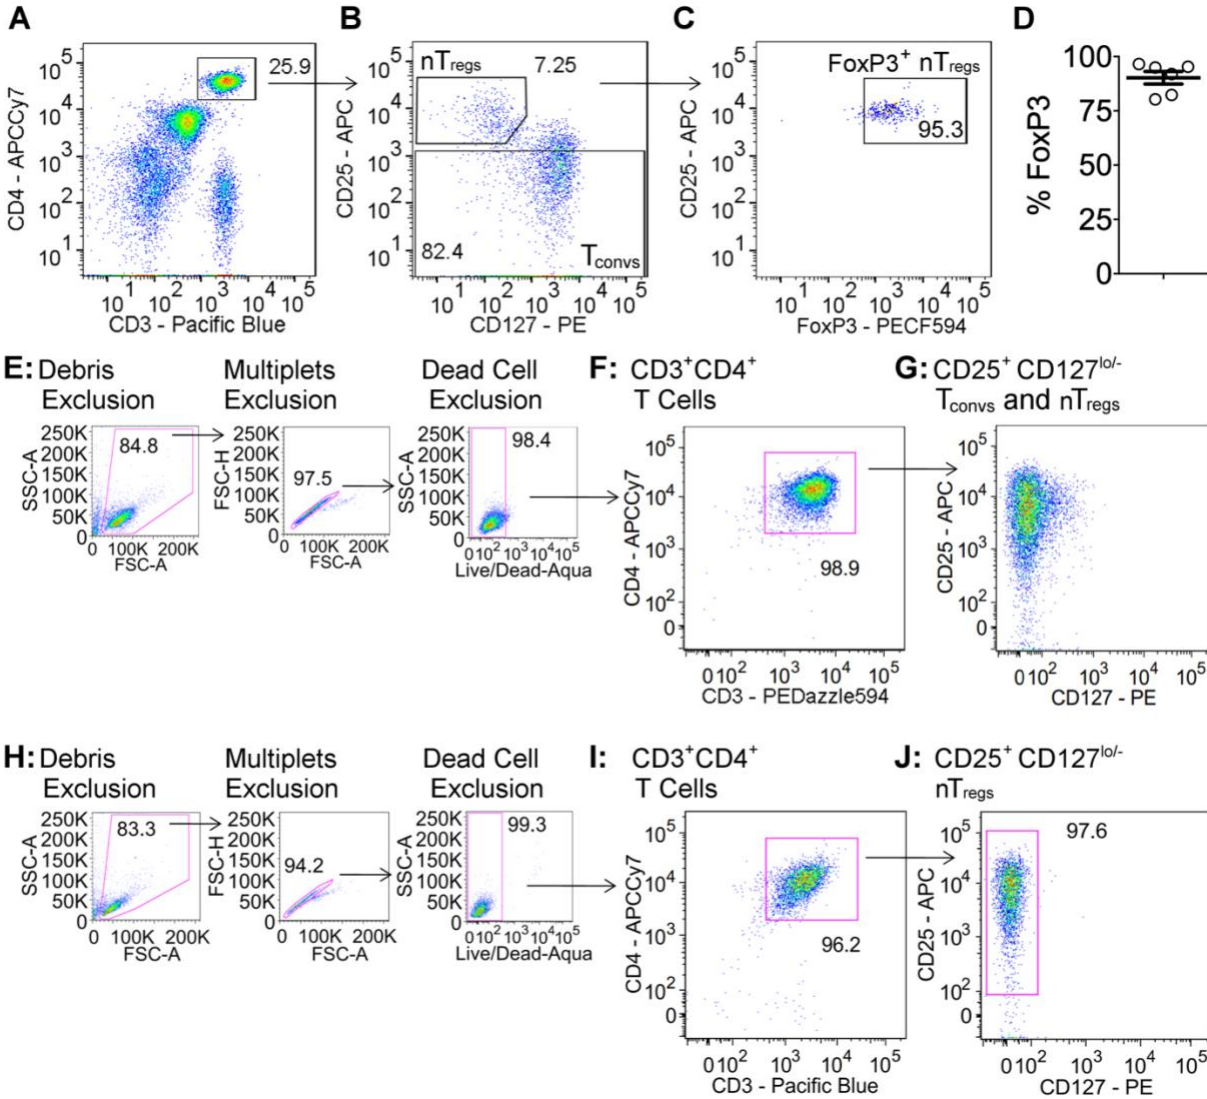

**Figure S6. Gating strategies for human T cell proliferation experiments.**

(A and B) CD3<sup>+</sup>CD4<sup>+</sup>CD25<sup>+</sup>CD127<sup>lo/-</sup> natural T<sub>regs</sub> (nT<sub>regs</sub>) and CD3<sup>+</sup>CD4<sup>+</sup> CD25<sup>-</sup> T<sub>convs</sub> were positively isolated by FACS.

(C and D) CD3<sup>+</sup>CD4<sup>+</sup>CD25<sup>+</sup>CD127<sup>lo/-</sup> nT<sub>regs</sub> were assessed for FoxP3 expression.

(E-G) Gating strategy for analyzing nT<sub>reg</sub> and T<sub>conv</sub> proliferation when co-cultured. (E) Debris, multiplets and dead cells were excluded, (F) CD3<sup>+</sup>CD4<sup>+</sup> cells were gated. CD3<sup>+</sup>CD4<sup>+</sup> cells were then analyzed for nT<sub>reg</sub> and T<sub>conv</sub> proliferation by CFSE and CellTrace Violet dilution, respectively.

(G) nT<sub>regs</sub> and T<sub>convs</sub> were both CD25<sup>+</sup>CD127<sup>lo/-</sup> post-stimulation, so CD25 and CD127 expression was not used to delineate T<sub>regs</sub> and T<sub>convs</sub> prior to CFSE and CellTrace Violet dye dilution analysis



(H-J) Gating strategy for analyzing nT<sub>reg</sub> proliferation when cultured alone. (H) Debris, multiplets and dead cells were excluded, (I) CD3<sup>+</sup>CD4<sup>+</sup> cells were gated, (J) CD127<sup>lo/-</sup> cells were gated as nT<sub>regs</sub>. nT<sub>regs</sub> were then analyzed for proliferation by CFSE dilution.

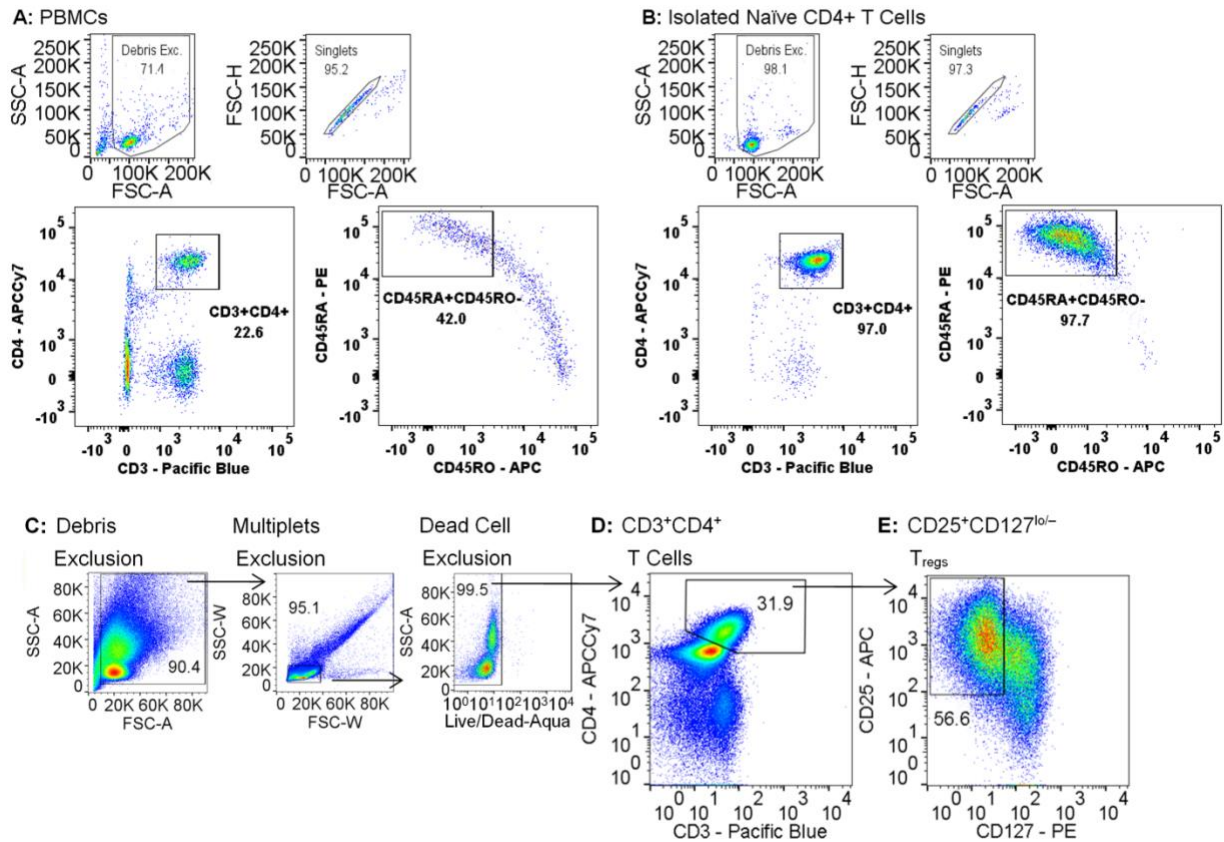

**Figure S7. Gating strategies for human induced T<sub>reg</sub> (iT<sub>reg</sub>) differentiation experiment.**

(A and B) Purity check for naive CD4<sup>+</sup> T cells (CD3<sup>+</sup>CD4<sup>+</sup>CD45RA<sup>+</sup>CD45RO<sup>-</sup>) (A) before negative isolation (peripheral blood mononuclear cells, PBMCs) and (B) after negative isolation.

(C-E) Gating strategy for analyzing iT<sub>reg</sub> differentiation. (C) Debris, multiplets and dead cells were excluded, (D) CD3<sup>+</sup>CD4<sup>+</sup> cells were gated, (E) CD25<sup>+</sup>CD127<sup>lo/-</sup> cells were gated as iT<sub>regs</sub>.

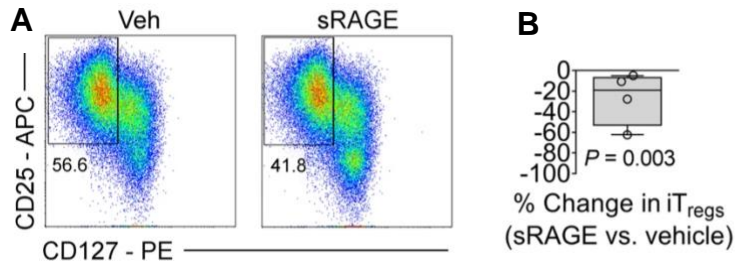

**Figure S8. Human  $iT_{reg}$  differentiation in AGE-containing culture media is modestly decreased by sRAGE treatment.**

Human naive  $CD3^+CD4^+CD45RA^+CD45RO^-$  T cells were incubated in 3 day co-culture containing 5 ng/mL IL-2, 2 ng/mL TGF- $\beta$  and 1  $\mu$ g/mL plate-bound anti-CD3 antibody.

(A) Representative dot plots of  $CD3^+CD4^+CD25^+CD127_{lo/-}$   $iT_{reg}$ s in AGE-supplemented media with co-administration of vehicle or sRAGE (50  $\mu$ g/day).

(B) Quantification of change in  $iT_{reg}$  differentiation by sRAGE treatment. Data shown as mean  $\pm$  SD; paired t-tests;  $n = 4$ /group.



**Table S1. Human nT<sub>reg</sub> NanoString predicted upstream regulators.**

| Gene Name                                          | Log10<br>FDR <i>P</i> |                         |        |         |        |
|----------------------------------------------------|-----------------------|-------------------------|--------|---------|--------|
|                                                    |                       | NFATC2                  | 2.9393 | BACH2   | 2.0630 |
|                                                    |                       | mir-155                 | 2.8268 | MYC     | 2.0462 |
| CD28                                               | 9.9136                | POU5F1                  | 2.8125 | MTOR    | 2.0205 |
| IL2                                                | 8.5086                | REL                     | 2.8013 | CYTOR   | 1.9830 |
| CD3                                                | 6.0650                | VAV                     | 2.7620 | TNFRSF8 | 1.9830 |
| IL4                                                | 6.0022                | PRELID1                 | 2.7620 | CTBP2   | 1.9830 |
| TBX21                                              | 5.5784                | TNFRSF4                 | 2.7620 | ALK     | 1.9830 |
| NPC2                                               | 5.4168                | MIR4281                 | 2.7620 | NANOG   | 1.9469 |
| CEBPB                                              | 4.8601                | TPO                     | 2.7620 | ETS     | 1.9172 |
| STAT3                                              | 4.8097                | TCF12                   | 2.7496 | PRKDC   | 1.9172 |
| GATA3                                              | 4.5986                | mir-21                  | 2.7033 | NR4A2   | 1.9172 |
| TCR                                                | 4.3893                | STAT5a/b                | 2.5969 | STAT5B  | 1.9172 |
| PDCD1                                              | 4.3449                | TGFB1                   | 2.5376 | WNT3A   | 1.9172 |
| IL12 (complex)                                     | 4.2197                | RELA                    | 2.4724 | CAMK4   | 1.8601 |
| miR-9-5p (and other<br>miRNAs w/seed<br>CUUUGGU)   | 4.2140                | BTK                     | 2.4685 | TNFSF9  | 1.8601 |
|                                                    |                       | PIWIL2                  | 2.4597 | SSTR2   | 1.8601 |
| NPC1                                               | 3.9830                | USP21                   | 2.4597 | CDKN1B  | 1.8601 |
| mir-9                                              | 3.8861                | IL21                    | 2.2993 | EGFR    | 1.8210 |
| TIGIT                                              | 3.8861                | TLR9                    | 2.2993 | CLEC7A  | 1.8097 |
| HSPD1                                              | 3.8861                | IL10RA                  | 2.2840 | TPM3    | 1.8097 |
| CHRNA3                                             | 3.8861                | FLOT2                   | 2.2840 | mir-132 | 1.8097 |
| TNF                                                | 3.8297                | ICOSLG/<br>LOC102723996 | 2.2840 | STK4    | 1.8097 |
| CTNNB1                                             | 3.7328                | PTPN22                  | 2.2840 | IL9     | 1.8097 |
| PHB2                                               | 3.7190                | BCR (complex)           | 2.2588 | PTPN6   | 1.8097 |
| IL24                                               | 3.7190                | COL18A1                 | 2.2328 | RPS6KA3 | 1.8097 |
| SAA                                                | 3.6478                | HIF1A                   | 2.2218 | CYP1B1  | 1.8097 |
| TLR2                                               | 3.6345                | calpain                 | 2.1599 | BRD4    | 1.7696 |
| CD46                                               | 3.5186                | CRBN                    | 2.1599 | Wnt     | 1.7645 |
| IL12B                                              | 3.5186                | MAP2K4                  | 2.1599 | BCL6B   | 1.7645 |
| P2RX7                                              | 3.4078                | COPA                    | 2.1599 | CD5     | 1.7645 |
| NR3C1                                              | 3.2457                | IL4R                    | 2.1599 | FCGR2A  | 1.7235 |
| Interferon alpha                                   | 3.1778                | IL10                    | 2.0926 | PIM2    | 1.7235 |
| FOXP3                                              | 3.1035                | ELAVL1                  | 2.0814 | ENG     | 1.7235 |
| NFkB (complex)                                     | 3.1024                | Integrin                | 2.0630 | IL7     | 1.7235 |
| HSF1                                               | 3.1002                | HIF3A                   | 2.0630 | ELF5    | 1.7235 |
| miR-21-5p (and<br>other miRNAs<br>w/seed AGCUUAAU) | 2.9393                | PIM3                    | 2.0630 | CEBPA   | 1.6968 |
|                                                    |                       | ZBTB7B                  | 2.0630 | mir-154 | 1.6861 |
| SELPLG                                             | 2.9393                | SPIB                    | 2.0630 | NR6A1   | 1.6861 |
|                                                    |                       |                         |        | CFLAR   | 1.6861 |

|               |        |                 |        |
|---------------|--------|-----------------|--------|
| PRKCD         | 1.6840 | SMARCA4         | 1.3706 |
| IFNG          | 1.6737 | Hsp27           | 1.3546 |
| IL6           | 1.6655 | F7              | 1.3546 |
| CRTC2         | 1.6517 | NFKB2           | 1.3546 |
| IL12 (family) | 1.6517 | RNASE2          | 1.3391 |
| LRP6          | 1.6517 | RARA            | 1.3363 |
| SYN1          | 1.6517 | TAL1            | 1.3279 |
| ICOS          | 1.6517 | miR-155-5p      |        |
| TMSB4         | 1.6198 | (miRNAs w/ seed | 1.3233 |
| Calcineurin   |        | UAAUGCU)        |        |
| protein(s)    | 1.6198 | mir-29          | 1.3233 |
| NFKBIZ        | 1.6198 | HMGA1           | 1.3089 |
| RORC          | 1.6198 | PKM             | 1.3089 |
| MIF           | 1.6198 |                 |        |
| TRIB3         | 1.5901 |                 |        |
| FOXP1         | 1.5901 |                 |        |
| Tgf beta      | 1.5622 |                 |        |
| DPH5          | 1.5622 |                 |        |
| PRDM1         | 1.5622 |                 |        |
| BCL11B        | 1.5622 |                 |        |
| USP7          | 1.5361 |                 |        |
| CAV1          | 1.5361 |                 |        |
| RAC1          | 1.5114 |                 |        |
| MMP2          | 1.5114 |                 |        |
| TP73          | 1.4935 |                 |        |
| Smad2/3       | 1.4881 |                 |        |
| TNFRSF1A      | 1.4881 |                 |        |
| KIT           | 1.4881 |                 |        |
| Mapk          | 1.4461 |                 |        |
| GFI1          | 1.4461 |                 |        |
| ZBTB16        | 1.4260 |                 |        |
| RAF1          | 1.4260 |                 |        |
| ATF2          | 1.4260 |                 |        |
| CCL2          | 1.4067 |                 |        |
| ZEB1          | 1.4067 |                 |        |
| NR112         | 1.4067 |                 |        |
| USF2          | 1.4067 |                 |        |
| PIM1          | 1.3893 |                 |        |
| CTLA4         | 1.3716 |                 |        |
| RELB          | 1.3716 |                 |        |

**Table S2. Human nT<sub>reg</sub> NanoString network analysis.**

| Focus Molecules (Count / Total)                                                                                                                                                    | Log <sub>10</sub> <i>P</i> (Score) |
|------------------------------------------------------------------------------------------------------------------------------------------------------------------------------------|------------------------------------|
| AHR, GZMA, JAK1, STAT4, BACH2, FOXP3, GZMB, IL23A, JAK3, TIGIT, CCR4, GATA3, IL10RA, IL4R, IRF4, SOCS5, STAT5B, TNFRSF1A, CD226, IL7R, ITK, NFATC2, STAT3, STAT6 (24/44 molecules) | 57                                 |
| BTLA, KLF3, LGALS1, TNF, CCR4, CCR7, EOMES, GZMK, PTGER2 (9/35 molecules)                                                                                                          | 11                                 |
| CD96 (1/2 molecules)                                                                                                                                                               | 2                                  |
| GNLY, PDCD1 (2/5 molecules)                                                                                                                                                        | 2                                  |
| IFNG, KLRB1, ZBTB16 (3/8 molecules)                                                                                                                                                | 2                                  |
| CD27, CD40LG (2/12 molecules) – <i>not significant</i>                                                                                                                             | 1                                  |
| ITGA1, TGFB1 (2/22 molecules) – <i>not significant</i>                                                                                                                             | 1                                  |

**Table S3. Human nT<sub>reg</sub> NanoString volcano plot values.**

| Gene Name                                          | Log2 fold change | Log10 FDR <i>P</i> |         |         |         |
|----------------------------------------------------|------------------|--------------------|---------|---------|---------|
| <b>Downregulated Genes</b>                         |                  |                    | BCL6    | -1.6249 | -1.1240 |
| <i>Significant &amp; Log2 Fold Change &gt;  1 </i> |                  |                    | IL9     | -1.6055 | -0.2823 |
| IL7R                                               | -2.5484          | -1.7546            | NT5E    | -1.3630 | -1.2081 |
| CD49a                                              | -2.0803          | -2.0649            | ENTPD1  | -1.2501 | -0.8104 |
| PTGER2                                             | -1.9939          | -2.1195            | IL1A    | -1.1942 | -1.2454 |
| TIGIT                                              | -1.8914          | -2.9172            | IFNAR1  | -0.9949 | -1.1934 |
| IL23A                                              | -1.5512          | -2.0649            | JUN     | -0.9625 | -0.8104 |
| BACH2                                              | -1.4216          | -1.3429            | CD137   | -0.9331 | -1.0007 |
| CD96                                               | -1.3483          | -2.2805            | CD45RA  | -0.9205 | -0.2759 |
| IL10RA                                             | -1.2758          | -1.8328            | CD134   | -0.8898 | -0.8104 |
| GZMK                                               | -1.2721          | -1.5859            | CXCR5   | -0.8268 | -0.6385 |
| EOMES                                              | -1.1603          | -2.2805            | CCR6    | -0.7857 | -1.1781 |
| STAT5B                                             | -1.0845          | -2.2805            | ADORA2A | -0.7784 | -1.2081 |
| STAT4                                              | -1.0534          | -2.2805            | CD69    | -0.7732 | -1.0007 |
| SOCS5                                              | -1.0118          | -2.2805            | FOS     | -0.7692 | -0.4594 |
| AHR                                                | -1.0036          | -2.2805            | CCL5    | -0.7610 | -0.5731 |
| KLRB1                                              | -1.0012          | -1.6611            | IL18R1  | -0.7587 | -0.9195 |
| <i>Significant &amp; Log2 Fold Change &lt;  1 </i> |                  |                    | CXCR6   | -0.7412 | -1.1861 |
| JAK1                                               | -0.9607          | -2.2805            | MAF     | -0.7076 | -0.8492 |
| ITK                                                | -0.9462          | -2.2399            | CCR7    | -0.6972 | -0.9349 |
| CD27                                               | -0.9205          | -1.5859            | JAK2    | -0.6870 | -1.1781 |
| GNLY                                               | -0.9122          | -1.7023            | ITGA4   | -0.6773 | -0.8492 |
| CD272                                              | -0.8973          | -1.7546            | CXCL8   | -0.6668 | -0.2232 |
| GATA3                                              | -0.8789          | -2.2805            | CX3CR1  | -0.6629 | -0.6085 |
| IRF4                                               | -0.8451          | -1.7023            | KLF2    | -0.6381 | -1.0614 |
| CCR4                                               | -0.7954          | -2.2274            | IL21R   | -0.6134 | -0.5089 |
| STAT6                                              | -0.7749          | -2.0649            | HLA.DRA | -0.5774 | -1.2081 |
| KLF3                                               | -0.7526          | -1.3783            | IL27RA  | -0.5764 | -1.1781 |
| CD226                                              | -0.7137          | -1.9163            | PRDM1   | -0.5591 | -0.8104 |
| FOXP3                                              | -0.6978          | -1.5387            | IFNGR1  | -0.5530 | -1.2081 |
| TNFR1                                              | -0.6097          | -1.4873            | STAT5A  | -0.5115 | -1.0310 |
| STAT3                                              | -0.6097          | -1.3095            | GZMM    | -0.5023 | -0.1776 |
| NFATC2                                             | -0.6054          | -1.7023            | IL2RB   | -0.5011 | -0.9057 |
| IL4R                                               | -0.5634          | -1.4870            | SOCS1   | -0.4920 | -1.0009 |
| JAK3                                               | -0.5127          | -1.3019            | PTGDR2  | -0.4850 | -0.5087 |
| <i>Not Significant</i>                             |                  |                    | ZBTB16  | -0.4826 | -0.4766 |
| EGR2                                               | -1.8547          | -0.9349            | STAT1   | -0.4627 | -1.1781 |
|                                                    |                  |                    | CD45R0  | -0.4396 | -0.8966 |
|                                                    |                  |                    | SELL    | -0.4279 | -1.1240 |

|         |         |         |
|---------|---------|---------|
| RUNX3   | -0.4201 | -0.9349 |
| RUNX1   | -0.4166 | -1.2454 |
| IL32    | -0.3852 | -1.2569 |
| PVRIG   | -0.3722 | -0.6077 |
| CTLA4   | -0.3668 | -0.5973 |
| IL13    | -0.3609 | -0.1390 |
| CCR5    | -0.3567 | -0.1867 |
| IL12RB2 | -0.3445 | -0.7985 |
| CCL4    | -0.3087 | -0.1074 |
| CD3D    | -0.3003 | -1.0009 |
| FAS     | -0.2993 | -0.7200 |
| NFKB1   | -0.2641 | -0.3327 |
| CD4     | -0.2562 | -0.8104 |
| GFI1    | -0.2466 | -0.5371 |
| PDCD1   | -0.2256 | -0.2111 |
| IL2RA   | -0.1373 | -0.2670 |
| TGFB1   | -0.1181 | -0.2759 |
| LCK     | -0.1157 | -0.2823 |
| CD28    | -0.0971 | -0.2681 |
| IFNG    | -0.0852 | -0.0887 |
| TNF     | -0.0831 | -0.0751 |
| S1PR1   | -0.0366 | -0.0942 |
| PRF1    | -0.0214 | -0.0208 |
| SOCS3   | 0.0052  | -0.0034 |

#### Upregulated Genes

##### *Significant & Log2 Fold Change > |1|*

|        |        |         |
|--------|--------|---------|
| GZMB   | 2.4512 | -2.1857 |
| GZMA   | 1.8410 | -2.2805 |
| LGALS1 | 1.0369 | -2.1817 |

##### *Not Significant*

|        |        |         |
|--------|--------|---------|
| IL10   | 1.6348 | -1.2429 |
| IL17F  | 0.9889 | -0.5126 |
| IL4    | 0.9328 | -0.9304 |
| CXCR3  | 0.8543 | -1.0007 |
| IL22   | 0.8312 | -0.4766 |
| HAVCR2 | 0.4377 | -1.1479 |
| LAG3   | 0.3871 | -0.5112 |
| CD40LG | 0.3713 | -0.8358 |
| ITGAE  | 0.2601 | -0.6085 |
| TBX21  | 0.2408 | -0.4799 |

|      |        |         |
|------|--------|---------|
| CD38 | 0.2017 | -0.2113 |
| ICOS | 0.1964 | -0.4859 |
| RORC | 0.1478 | -0.2113 |
| IL5  | 0.1379 | -0.0361 |
